# Supplementary material for: Correlations of chlamydia and gonorrhoea among pharyngeal, rectal and urethral sites among Thai men who have sex with men: multicentre community-led test and treat cohort in Thailand
Source: PubMed Central journal article supplement — BMJ Open. 2019 Jun 27;9(6):e028162. doi: 10.1136/bmjopen-2018-028162 (PMC6609041; doi:10.1136/bmjopen-2018-028162), 2019-06-27
Supplement: bmjopen-2018-028162.draft_revisions.pdf [file bmjopen-2018-028162.draft_revisions.pdf]

# BMJ Open

BMJ Open is committed to open peer review. As part of this commitment we make the peer review history of every article we publish publicly available.

When an article is published we post the peer reviewers' comments and the authors' responses online. We also post the versions of the paper that were used during peer review. These are the versions that the peer review comments apply to.

The versions of the paper that follow are the versions that were submitted during the peer review process. They are not the versions of record or the final published versions. They should not be cited or distributed as the published version of this manuscript.

BMJ Open is an open access journal and the full, final, typeset and author-corrected version of record of the manuscript is available on our site with no access controls, subscription charges or pay-per-view fees (<http://bmjopen.bmj.com>).

If you have any questions on BMJ Open's open peer review process please email [info.bmjopen@bmj.com](mailto:info.bmjopen@bmj.com)

# BMJ Open

## Correlations of chlamydia and gonorrhoea between pharyngeal, rectal, and urethral sites among Thai men who have sex with men: how much can we missed by single site anatomical screening?

|                               |                                                                                                                                                                                                                                                                                                                                                                                                                                                                                                                       |
|-------------------------------|-----------------------------------------------------------------------------------------------------------------------------------------------------------------------------------------------------------------------------------------------------------------------------------------------------------------------------------------------------------------------------------------------------------------------------------------------------------------------------------------------------------------------|
| Journal:                      | <i>BMJ Open</i>                                                                                                                                                                                                                                                                                                                                                                                                                                                                                                       |
| Manuscript ID                 | bmjopen-2018-028162                                                                                                                                                                                                                                                                                                                                                                                                                                                                                                   |
| Article Type:                 | Research                                                                                                                                                                                                                                                                                                                                                                                                                                                                                                              |
| Date Submitted by the Author: | 26-Nov-2018                                                                                                                                                                                                                                                                                                                                                                                                                                                                                                           |
| Complete List of Authors:     | Hiransuthikul, Akarin; The Thai Red Cross AIDS Research Centre, Sungsing, Thanthip; The Thai Red Cross AIDS Research Centre Jantarapakde, Jureeporn; The Thai Red Cross AIDS Research Centre Trachunthong, Deondara; The Thai Red Cross AIDS Research Centre Mills, Stephen; LINKAGES Thailand FHI360 Vannakit, Ravipa; Office of Public Health, United States Agency for International Development Phanuphak, P; The Thai Red Cross AIDS Research Centre Phanuphak, Nittaya; The Thai Red Cross AIDS Research Centre |
| Keywords:                     | HIV & AIDS < INFECTIOUS DISEASES, Men who have sex with men, Chlamydia trachomatis, Neisseria gonorrhoeae                                                                                                                                                                                                                                                                                                                                                                                                             |
|                               |                                                                                                                                                                                                                                                                                                                                                                                                                                                                                                                       |

SCHOLARONE™  
Manuscripts

**TITLE PAGE**

**Title:** Correlations of chlamydia and gonorrhoea between pharyngeal, rectal, and urethral sites among Thai men who have sex with men: how much can we miss by single site anatomical screening?

**Running head:** Anatomical site correlations of CT/NG infections among MSM

**Authors:** Akarin Hiransuthikul, MD<sup>1</sup>, Thanthip Sungsing, MSc<sup>1</sup>, Jureeporn Jantarapakde, MSc<sup>1</sup>, Deondara Trachunthong, MSc<sup>1</sup>, Stephen Mills, PhD<sup>2</sup>, Ravipa Vannakit, MSPH<sup>3</sup>, Praphan Phanuphak, MD, PhD<sup>1</sup>, Nittaya Phanuphak, MD, PhD<sup>1</sup>

**Affiliations:**

<sup>1</sup> The Thai Red Cross AIDS Research Centre, Bangkok, Thailand

<sup>2</sup> LINKAGES Thailand FHI360, Bangkok, Thailand

<sup>3</sup> Office of Public Health, United States Agency for International Development, Bangkok, Thailand

**Correspondence:** Akarin Hiransuthikul, The Thai Red Cross AIDS Research Centre, 104

Ratchadamri Road, Pathumwan, Bangkok, Thailand 10330. E-mail: ahiransuthikul@gmail.com

**Word counts:** 2654/4000

**Tables/Figures:** 4/5

**Conflict of interest:** The authors declared no conflict of interest relevant to this work

**ABSTRACT** (299/300)

Objective: Routine screening for *Chlamydia trachomatis* (CT) and *Neisseria gonorrhoeae* (NG) infections in sexually-exposed anatomical sites may be challenging due to high cost, especially in resource-limited settings. The objective of this study was to evaluate concurrent CT/NG infections in pharyngeal, rectal, and urethral sites to determine the potential proportion of missed CT/NG infections if single anatomical site screening was performed among men who have sex with men (MSM).

Methods: Thai MSM were enrolled to the Community-led Test and Treat cohort. Screening for CT/NG infections was performed from pharyngeal swab, rectal swab, and urine using nucleic acid amplification testing. The correlations of CT/NG among the three anatomical sites were analyzed.

Results: Of 1610 MSM, with a median (IQR) age of 24.2 (20.8-30.0) years, enrolled, the prevalence of CT/NG infections was 29.9%. HIV-positive participants had significantly higher prevalence of CT/NG infections in all anatomical sites, except for pharyngeal NG. In a correlation analysis, 22.7% of those tested negative at pharyngeal site had either rectal or urethral infections (41.3% in HIV-positive vs 18.6% in HIV-negative MSM,  $p < 0.001$ ), 12.8% of those tested negative at rectal site had either pharyngeal or urethral infections (18.8% vs 11.8%,  $p = 0.007$ ), and 22.4% of those tested negative from urine had either pharyngeal or rectal infections (40.0% vs 18.6%,  $p < 0.001$ ). HIV-positive status was associated with urethral CT/NG infections among MSM who tested negative at the rectal site (adjusted odd ratio [aOR] 1.9; 95%CI 1.1-3.5,  $p = 0.04$ ). Among 481 MSM with CT/NG infections, 34.5-68.8% can be missed if the screening test was done in single anatomical site.

1  
2  
3 Conclusions: High proportions of CT/NG infections would be missed if single anatomical site  
4 screening was performed, especially rectal CT/NG infections among HIV-positive MSM. Studies  
5  
6 on new technologies which allow CT/NG screening in pooled samples from different anatomical  
7  
8 sites at affordable price are urgently needed.  
9  
10  
11  
12  
13  
14  
15

### 16 **Strengths and limitations of this study**

- 17 - The study includes a large number of sexually active MSM who completed CT/GC  
18 screening in all 3 anatomical sites.
- 19 - Correlations of CT/NG infections between pharyngeal, rectal, and urethral sites among  
20 sexually active MSM were identified, and showed the percentage of possible missed  
21 diagnosis if single anatomical site screening was performed.
- 22 - Because CT/NG screening in our study were based on self-reported site of exposure, we  
23 were unable to compare the performance between a history-based and universal  
24 approach.
- 25 - Extra-genitalia samples from a modest number of participants may have been missed due  
26 to social desirability bias regarding questions about the site(s) of sexual contact.  
27  
28  
29  
30  
31  
32  
33  
34  
35  
36  
37  
38  
39  
40  
41  
42  
43  
44  
45  
46  
47  
48  
49  
50  
51  
52  
53  
54  
55  
56  
57  
58  
59  
60

## MAIN TEXT

### Introduction

*Chlamydia trachomatis* (CT) and *Neisseria gonorrhoeae* (NG) infections are among the most common bacterial sexually transmitted infections (STIs) and disproportionately affect men who have sex with men (MSM) worldwide.<sup>1</sup> Two large studies conducted in Thailand between 2006 and 2010 showed that, compared to men who have sex exclusively with women, MSM had approximately 30% higher prevalence of CT infection and up to 5 times higher prevalence of NG infection.<sup>2,3</sup>

CT/NG infections are associated with acquiring and transmitting HIV infection.<sup>4</sup> In particular, rectal CT/NG infection is strongly associated with an increased risk of HIV acquisition among MSM.<sup>5,6</sup> In contrast, the role of pharyngeal CT/NG infections towards HIV acquisition is less understood. One large cross-sectional study showed an association between pharyngeal infection and MSM diagnosed with HIV,<sup>7</sup> but this can be an indirect effect of oral sex increasing the risk of STIs at other anatomical sites.<sup>8</sup> As CT/NG infections often occur without symptoms,<sup>1</sup> the lack of routine asymptomatic screening has resulted in the missed opportunity to diagnosis these easily treated STIs.

The diagnosis of CT/NG infections, both at genital and extra-genital sites, can be made using nucleic acid amplification tests (NAATs). Many studies have shown superior sensitivity and specificity of NAATs in detecting extra-genital CT/NG infection compared to culture.<sup>9-12</sup> The findings prompted the US Center for Disease Control and Prevention (CDC) to recommend the use of NAATs for pharyngeal and rectal CT/NG screening,<sup>13</sup> although they have not been cleared by the US Food and Drug Administration.

1  
2  
3 Frequency of testing and anatomical sites to be tested are the two factors to consider in  
4 asymptomatic CT/NG screening. Most recommendations for CT/NG screening, including the  
5 one by the US CDC, recommend all sexually active MSM to be screened at least annually at sites  
6 of contact regardless of condom use.<sup>13</sup> More frequent screening is advised if the individuals are  
7 at increased risk. Conversely, the Australian STI management guidelines recommend screening  
8 at all sites regardless of reported sites of contact.<sup>14</sup> However, many barriers prevent the  
9 implementation of these recommendations in clinical practice. For the clients, these barriers may  
10 include the cost of tests, underestimating the risk of asymptomatic infections, and concern of  
11 being stigmatized.<sup>15 16</sup> Healthcare providers also often lack knowledge on the importance of STI  
12 screening at appropriate anatomical sites,<sup>15</sup> which may also be the case in Thailand where there  
13 are no consensus recommendations for CT/NG screening.  
14  
15  
16  
17  
18  
19  
20  
21  
22  
23  
24  
25  
26  
27  
28

29 Our primary objective was to study the correlations between pharyngeal, rectal, and  
30 urethral CT/NG infections to determine the proportions and associated factors of potential  
31 CT/NG infections missed if single anatomical site screening was performed. Other objectives  
32 were to determine the prevalence of CT/NG infections among MSM enrolled in the Community-  
33 led Test and Treat cohort and to determine the pattern of single and multiple anatomic sites of  
34 CT/NG infections. The findings from our study will be crucial to guide recommendations for  
35 CT/NG screening among MSM, both in HIV treatment and prevention programs, in resource-  
36 limited settings.  
37  
38  
39  
40  
41  
42  
43  
44  
45  
46  
47  
48  
49  
50

## 51 **Methods**

### 52 *Enrollment of participants*

1  
2  
3 The present study used data from MSM participants enrolled in the Community-led Test  
4 and Treat cohort between October 2015 and October 2016. The Community-led Test and Treat  
5 cohort aims to evaluate the feasibility of empowering lay providers who are members of MSM  
6 and transgender women (TGW) communities to provide HIV-related services, increasing uptake  
7 of HIV testing and treatment services among MSM and TGW in Thailand.  
8  
9  
10  
11  
12  
13  
14

15 Eligible criteria and study procedures for the Community-led Test and Treat cohort have  
16 been reported in detail previously.<sup>17</sup> Adults Thai MSM and TGW with a history of at least one  
17 unprotected anal sexual intercourse with a man in the past 6 months were enrolled from Service  
18 Workers IN Group (SWING) drop-in centers (DICs) in Bangkok and Pattaya city, Rainbow Sky  
19 Association of Thailand (RSAT) DICs in Bangkok and Songkhla, Caremat DIC in Chiang Mai,  
20 and Sisters DIC in Pattaya city, Thailand for an 18-month follow-up period for an 18-month  
21 follow-up period. Only participants of unknown HIV-status were enrolled, volunteers with  
22 known HIV infection were excluded from enrollment. Screening for CT and NG was performed  
23 at enrollment using nucleic acid amplification testing (NAAT, Abbott Real Time CT/NG, Abbott  
24 Molecular Inc., Illinois, USA) with pharyngeal swab, rectal swab, and/or urine collection  
25 depending of participants' self-report of site(s) of sexual contact. Participants who completed  
26 both CT and NG screening in all 3 anatomical sites were included in this analysis.  
27  
28  
29  
30  
31  
32  
33  
34  
35  
36  
37  
38  
39  
40  
41  
42  
43

44 The study (NCT03580512) was approved by the institutional review boards of the  
45 Faculty of Medicine, Chulalongkorn University (IRB No. 181/57), the Department of Disease  
46 Control, Thai Ministry of Public Health (IRB No. 9/57-678), the Provincial Health Offices of  
47 Chonburi (IRB No. 0032.003/658), Songkhla (IRB No. 075/2014), and Chiang Mai (IRB No.  
48 0032.002/35859). All participants gave informed consent.  
49  
50  
51  
52  
53  
54  
55

### 56 *Statistical Analysis*

57  
58  
59  
60



1  
2  
3 Statistical analysis was performed using Stata 13 (StataCorp LP, College Station, TX,  
4 USA). Demographic, CT/NG and HIV testing results, and sexual risk behaviors were  
5 summarized as median (interquartile range [IQR]) and number (percentage) for continuous and  
6 categorical variables, respectively. Characteristics between HIV-positive and HIV-negative  
7 participants were compared using a chi-square or Fisher's exact test, or Mann-Whitney test as  
8 appropriate. The baseline prevalence of CT/NG infections was calculated.  
9  
10  
11  
12  
13  
14  
15  
16

17  
18 Multivariate logistic regression with 95% confidence intervals (CI), based on covariates  
19 associated with outcomes in univariate regression with p-value of <0.2, was used to identify  
20 associated factors for the prevalence of CT/NG in the remaining 2 sites. The proportion of  
21 potential CT/NG infections missed to the overall prevalence of CT/NG infections at baseline in  
22 the study was also analyzed to determine the case for CT/NG infections missed in the  
23 community. The correlation of CT/NG infections between each positive anatomical site were  
24 also analyzed to determine infection at multiple sites. Statistical significance was defined as  
25 p<0.05.  
26  
27  
28  
29  
30  
31  
32  
33  
34  
35  
36  
37  
38  
39

## 40 **Results**

### 41 *Participant characteristics*

42  
43  
44  
45 Of 1858 MSM enrolled in the Community-led Test and Treat cohort, a total of 1610  
46 (86.7%) participants completed both CT and NG testing in all 3 anatomical sites and were  
47 included in the analysis. Compared to MSM who did not complete CT/NG testing in all 3  
48 anatomical sites, MSM who completed CT/NG testing in all 3 anatomical sites had higher  
49  
50  
51  
52  
53  
54  
55  
56  
57  
58  
59  
60

1  
2  
3 prevalence of CT/NG infections at any anatomical sites (29.9% vs 16.4%,  $p<0.001$ ) and  
4  
5 reported higher sexual risk behaviors (**Supplementary Files 1**).

6  
7  
8 At enrollment, the prevalence of CT/NG infections at any anatomical sites was 29.9%  
9  
10 (95%CI 27.6-32.2). The most prevalent CT/NG infections by anatomical sites were rectal CT  
11  
12 (15.0%), rectal NG (9.3%), and urethral CT (7.0%). HIV-positive participants had significantly  
13  
14 higher prevalence of both CT and NG infections in all anatomical sites, except for pharyngeal  
15  
16 NG, and were more likely than HIV-negative participants to be enrolled from the Bangkok sites,  
17  
18 self-perceived high risk of HIV transmission in the past month, had unprotected sex in the past  
19  
20 month, and self-reported or unsure of having STIs in the past month (**Table 1**).

21  
22  
23  
24  
25 *Correlation between anatomical sites: the proportion of potential CT/NG missed if single*  
26  
27 *anatomical site screening was performed*

28  
29  
30 We analyzed the prevalence of CT/NG infections in the remaining 2 sites to that of  
31  
32 negative result site to determine the potential CT/NG infections that would be missed and left  
33  
34 untreated if they were tested at single anatomical site. Among 1460 participants who tested  
35  
36 negative for pharyngeal CT/NG infections, 16.9% had rectal infection and 8.8% had urethral  
37  
38 infection (22.7% had either rectal or urethral infection). HIV-positive MSM had significantly  
39  
40 higher prevalence of both rectal infection (34.1% vs 13.0%,  $p<0.001$ ) and urethral infection  
41  
42 (13.6% vs 7.8%,  $p=0.002$ ) compared to MSM who were HIV-negative (**Table 2**). Among 1295  
43  
44 participants who tested negative for rectal CT/NG infections, 6.3% had pharyngeal infection and  
45  
46 7.4% had urethral infection (12.8% had either pharyngeal or urethral infection). HIV-positive  
47  
48 MSM had significantly higher prevalence of either pharyngeal or urethral infection compared to  
49  
50 HIV-negative MSM (18.8% vs 11.8%,  $p=0.01$ ). Among 1455 participants who tested negative  
51  
52 for urethral CT/NG infections, 8.5% had pharyngeal infection and 17.6% had rectal infection  
53  
54  
55  
56  
57  
58  
59  
60

(22.4% had either pharyngeal or rectal infection). HIV-positive MSM had significantly higher prevalence of both pharyngeal infection (11.6% vs 7.7%,  $p=0.049$ ) and rectal infection (33.7% vs 14.1%,  $p<0.001$ ) compared to HIV-negative MSM.

In multivariate analysis, among those who tested negative at pharyngeal site, HIV-positive status (adjusted odd ratio [aOR] 2.9; 95%CI 2.1-4.1,  $p<0.001$ ), age  $\leq 25$  years old (aOR 1.7; 95% CI 1.2-2.3,  $p=0.003$ ), refusal to identify the number of sexual partners (aOR 1.8; 95% CI 1.1-2.9,  $p=0.02$ ), and had group sex in the past 6 months (aOR 1.9; 95% CI 1.3-3.0,  $p=0.002$ ) were associated with CT/NG infections at rectal site; and HIV-positive status (aOR 1.9; 95% CI 1.2-3.1,  $p=0.01$ ), enrolment in Bangkok (aOR 1.7; 95% CI 1.1-2.7,  $p=0.01$ ), had unprotected sex (aOR 2.0; 95% CI 1.1-3.9,  $p=0.04$ ), and had any STIs in the past 6 months (aOR 2.3; 95% CI 1.2-4.4,  $p=0.01$ ) were associated with CT/NG infections at urethral site (**Table 3**). Among those who tested negative for rectal CT/NG infections, HIV-positive status (aOR 1.9; 95%CI 1.1-3.5,  $p=0.04$ ) and enrolment in Bangkok (aOR 1.8; 95%CI 1.1-3.0,  $p=0.02$ ) were associated with urethral CT/NG infections. Among participants who tested negative for urethral CT/NG infections, had group sex in the past 6 months was associated with pharyngeal CT/NG infections (aOR 2.0; 95% CI 1.2-3.4,  $p=0.01$ ); and HIV-positive status (aOR 3.0; 95%CI 2.1-4.1,  $p<0.001$ ), age  $\leq 25$  years (aOR 1.5; 95%CI 1.1-2.1,  $p=0.01$ ), single status (aOR 1.7; 95% CI 1.2-2.5,  $p=0.003$ ), refusal to identify the number of sexual partners (aOR 1.6; 95% CI 1.1-2.6,  $p=0.01$ ), and had group sex in the past 6 months (aOR 1.9; 95%CI 1.3-2.8,  $p=0.002$ ) were associated with rectal CT/NG infections.

**Figure 1** details the distribution of all 481 participants with CT/NG infections by anatomical site. If only pharyngeal, rectal, or urethral screening had been conducted, 331

1  
2  
3 (68.8%), 166 (34.5%), 326 (67.8%) of 481 total CT/NG infections in the study would have been  
4 missed, respectively.  
5  
6

7  
8 *Relationship between anatomical sites: the pattern of single and multiple anatomic sites of*  
9 *CT/NG infections.*  
10  
11

12  
13  
14 Of 150 participants who had pharyngeal CT/NG, 46.7% were isolated to pharyngeal site,  
15 while 53.3% had additional infection in rectal and/or urethral sites. Among 315 participants who  
16 had rectal CT/NG, 64.1% were isolated to rectal site, while 35.9% had additional infection in  
17 pharyngeal and/or urethral site. And among 155 participants who tested positive for urethral  
18 CT/NG, 54.8% were isolated to urethral site, while 45.2% had additional infection in pharyngeal  
19 and/or rectal sites (**Figure 1**).  
20  
21  
22  
23  
24  
25  
26  
27  
28  
29  
30

## 31 **Discussion**

32  
33

34 We demonstrated correlations between CT/NG infections identified in different  
35 anatomical sites and showed that 13-23% of Thai MSM would miss having CT/NG infections  
36 diagnosed if the test was done in single anatomical site. Among MSM who were newly  
37 diagnosed with HIV infection, the proportion who would miss CT/NG diagnoses increased to 19-  
38 41% (**Table 2**). HIV-positive status was associated with non-rectal CT/NG infections among  
39 MSM who tested negative at the rectal site (**Table 3**). Up to 35-69% of overall CT/NG infection  
40 in the study can be missed if the screening test was done in single anatomical site (**Figure 1**).  
41  
42  
43  
44  
45  
46  
47  
48  
49  
50

51 CT and NG infections are common among sexually active Thai MSM. The overall  
52 prevalence in our cohort was 20.6% for CT infection and 14.5% for NG infection at any sites,  
53 both are comparable to the historical Thai Facility-based Test and Treat cohort (21.4% and  
54  
55  
56  
57  
58  
59  
60

1  
2  
3 12.4%, respectively) as well as the report from the CDC among US MSM.<sup>18 19</sup> The prevalence of  
4 both rectal CT and NG infections in our study were considerably higher than previously reported  
5 in the US and the Netherlands,<sup>1 20</sup> possibly due to our protocol's specific criteria of enrolling  
6 sexually active MSM and analyzing the subset of MSM who self-reported sexual contact in all 3  
7 anatomical sites, and the fact that we do not have routine screening which could cause higher  
8 prevalence than other settings with more routine screening.  
9  
10  
11  
12  
13  
14  
15  
16

17  
18 In contrast to calculating the proportion of individuals in a population with missed  
19 CT/NG infections, prior studies calculated the proportion of potential missed diagnoses to the  
20 overall number of infections. Among the first large study to report the proportion of infections  
21 missed if only single anatomical site screening was performed was the 2003 study among MSM  
22 in San Francisco, which showed that 90% of rectal CT and 78% of rectal NG would be missed if  
23 only urethral screening was performed.<sup>1</sup> A review of more recent studies reported a range of 68-  
24 84% of extra-genital NG infections and 64-76% of extra-genital CT infections among MSM  
25 would have been missed by urethral screening.<sup>20-23</sup> Our findings that 69%, 35%, 68% of CT/NG  
26 infections would have been missed, respectively, if only pharyngeal, rectal, or urethral screening  
27 was performed is in line with comparable to a large study among asymptomatic MSM in the  
28 U.S.<sup>22</sup>  
29  
30  
31  
32  
33  
34  
35  
36  
37  
38  
39  
40  
41  
42  
43

44 Among participants tested negative, we found a range of 13-23% of MSM with "false  
45 negative" result if the screening test was done at one anatomical site, with an increase up to 19-  
46 41% among HIV-positive participants. Ideally, screening in all 3 anatomical sites should be done  
47 among MSM. Our findings suggest that if only single anatomical site screening for CT/NG  
48 infections is available, rectal site screening results in the least percentage of MSM with missed  
49 CT/NG infections. If rectal was to be the only site for CT/NG screening, it would miss 35% of  
50  
51  
52  
53  
54  
55  
56  
57  
58  
59  
60

1  
2  
3 all CT/NG infections compared to approximately 70% by screening only pharyngeal or urethral  
4 sites. Multiple logistic regression showed that HIV-positive status was associated with non-rectal  
5 CT/NG infections among those tested negative at the rectal sites. Therefore, if resources only  
6  
7  
8 allow screening for all anatomical sites in selected sub-populations, HIV-positive MSM should  
9  
10  
11  
12 be prioritized.  
13  
14

15  
16 Although there are some differences in characteristics of CT/NG infections in each  
17 anatomical site,<sup>24</sup> once diagnosed, the site of infection may not be of great concern because the  
18 recommended treatment for CT/NG at either site is similar.<sup>25-27</sup> Therefore, what is most  
19  
20 important is the ability to detect CT and/or NG infections regardless of the anatomical site. Due  
21  
22 to their asymptomatic nature,<sup>1</sup> many patients may not be aware of the importance of the  
23  
24 infections and do not seek medical advice.<sup>16</sup> Healthcare provider can take the lead in  
25  
26 encouraging sexually active MSM to screen for CT/NG infections in all sites regardless of their  
27  
28 self-reported contact routes as the first step towards detecting and providing timely screening and  
29  
30 treatment to prevent transmission in the community.  
31  
32  
33  
34  
35  
36

37  
38 Certain limitations of this study need to be considered. First, we assessed sexual  
39 behaviors using a self-administered paper questionnaire and risk behaviors were captured within  
40 the past 6 months. While self-administered questionnaires help minimize participants' shyness  
41 and reluctance to provide information, actual risk behaviors may be underreported. Because CT  
42 and NG infections have a long duration of infection, capturing risk behaviors within the past 6  
43 months was beneficial in assessing risk behaviors since the potential contact date of the  
44  
45 infections. However, the relatively long recall period may lead to recall bias. Second, because  
46  
47 CT/NG screening in our study were based on self-reported site of exposure rather than universal  
48  
49 screening at all sites, we were unable to compare the performance between a history-based and  
50  
51  
52  
53  
54  
55  
56  
57  
58  
59  
60

1  
2  
3 universal approach. Furthermore, by limiting our analysis to MSM who self-reported sexual  
4 contact in all 3 anatomical sites, the findings may be biased towards those with higher risks which  
5 may have led to an over-estimation of prevalence of CT/NG infections in our sample. Finally, we  
6 may have missed extra-genitalia samples from a modest number of participants (248 MSM  
7 [13.4% of total MSM enrolled]) due to social desirability bias regarding questions about the  
8 site(s) of sexual contact.  
9

10  
11  
12 This study found a high proportion of CT/NG infections are missed in sexually active  
13 MSM if single anatomical site screening is performed, especially among HIV-positive MSM. We  
14 recommend that all anatomical sites should be screened for all MSM. However, if this is not  
15 feasible, rectal-only screening would ensure the greatest proportion of CT/NG would be  
16 diagnosed. Our results also suggest that HIV-positive MSM should be prioritized for all-site  
17 screening. Studies on new technologies that allow pooled samples from different anatomical sites  
18 and at an affordable price are urgently needed for routine asymptomatic CT/NG screening  
19 among MSM in resource-limited settings.  
20  
21  
22  
23  
24  
25  
26  
27  
28  
29  
30  
31  
32  
33  
34  
35  
36  
37  
38  
39  
40  
41  
42  
43  
44  
45  
46  
47  
48  
49  
50  
51  
52  
53  
54  
55  
56  
57  
58  
59  
60

## Acknowledgements

We would like to express our sincere thanks to all participants and study staff. This work was made possible by the United States Agency for International Development (USAID) and the United States President's Emergency Plan for AIDS Relief (PEPFAR). The contents are the responsibility of the LINKAGES project and do not necessarily reflect the views of USAID, PEPFAR, or the United States Government.

## Conflict of interest

The authors declared no conflict of interest relevant to this work.

## Authors' contributions

AH interpreted the data, drafted the manuscript, and performed statistical analysis. TS and JJ coordinated the study and oversaw data management. DT gave advised on statistical analysis and performed statistical analysis. TS, JJ, SM, RV, and NP designed and conducted the study. NP advised on the analysis plan. NP and PP led the study. All authors critically reviewed and approved the final draft of manuscript.

## Data sharing statement

Data are available. Please contact corresponding author.

## Funding statement

Funding for this projected was supported through LINKAGES, a five-year cooperative agreement (AID-OAA-A-14-00045), which is led by FHI 360 in partnership with IntraHealth International, Pact, and the University of North Carolina at Chapel Hill.



## References

1. Kent CK, Chaw JK, Wong W, et al. Prevalence of rectal, urethral, and pharyngeal chlamydia and gonorrhoea detected in 2 clinical settings among men who have sex with men: San Francisco, California, 2003. *Clinical infectious diseases : an official publication of the Infectious Diseases Society of America* 2005;**41**(1):67-74.
2. Tongtoyai J, Todd CS, Chonwattana W, et al. Prevalence and Correlates of Chlamydia trachomatis and Neisseria gonorrhoeae by Anatomic Site Among Urban Thai Men Who Have Sex With Men. *Sexually transmitted diseases* 2015;**42**(8):440-9.
3. Jatapai A, Sirivongrangson P, Lokpichat S, et al. Prevalence and risk factors for Chlamydia trachomatis infection among young Thai men in 2008-2009. *Sexually transmitted diseases* 2013;**40**(3):241-6.
4. Fleming DT, Wasserheit JN. From epidemiological synergy to public health policy and practice: the contribution of other sexually transmitted diseases to sexual transmission of HIV infection. *Sexually transmitted infections* 1999;**75**(1):3-17.
5. Bernstein KT, Marcus JL, Nieri G, et al. Rectal gonorrhoea and chlamydia reinfection is associated with increased risk of HIV seroconversion. *Journal of acquired immune deficiency syndromes* 2010;**53**(4):537-43.
6. Katz DA, Dombrowski JC, Bell TR, et al. HIV Incidence Among Men Who Have Sex With Men After Diagnosis With Sexually Transmitted Infections. *Sexually transmitted diseases* 2016;**43**(4):249-54.
7. Dudareva-Vizule S, Haar K, Sailer A, et al. Prevalence of pharyngeal and rectal Chlamydia trachomatis and Neisseria gonorrhoeae infections among men who have sex with men in Germany. *Sexually transmitted infections* 2014;**90**(1):46-51.

- 1  
2  
3 8. Glynn TR, Operario D, Montgomery M, et al. The Duality of Oral Sex for Men Who Have  
4  
5 Sex with Men: An Examination Into the Increase of Sexually Transmitted Infections  
6  
7 Amid the Age of HIV Prevention. *AIDS patient care and STDs* 2017;**31**(6):261-67.  
8  
9
- 10 9. Bachmann LH, Johnson RE, Cheng H, et al. Nucleic Acid Amplification Tests for Diagnosis  
11  
12 of *Neisseria gonorrhoeae* and *Chlamydia trachomatis* Rectal Infections. *Journal of*  
13  
14 *clinical microbiology* 2010;**48**(5):1827-32.  
15  
16
- 17 10. Bachmann LH, Johnson RE, Cheng H, et al. Nucleic acid amplification tests for diagnosis of  
18  
19 *Neisseria gonorrhoeae* oropharyngeal infections. *Journal of clinical microbiology*  
20  
21 2009;**47**(4):902-7.  
22  
23
- 24 11. Mimiaga MJ, Mayer KH, Reisner SL, et al. Asymptomatic gonorrhea and chlamydial  
25  
26 infections detected by nucleic acid amplification tests among Boston area men who have  
27  
28 sex with men. *Sexually transmitted diseases* 2008;**35**(5):495-8.  
29  
30
- 31 12. Schachter J, Moncada J, Liska S, et al. Nucleic acid amplification tests in the diagnosis of  
32  
33 chlamydial and gonococcal infections of the oropharynx and rectum in men who have sex  
34  
35 with men. *Sexually transmitted diseases* 2008;**35**(7):637-42.  
36  
37
- 38 13. Workowski KA, Bolan GA. Sexually transmitted diseases treatment guidelines, 2015.  
39  
40 *MMWR Recomm Rep* 2015;**64**(Rr-03):1-137.  
41  
42
- 43 14. Ooi C, Lewis D. Updating the management of sexually transmitted infections. *Australian*  
44  
45 *Prescriber* 2015;**38**(6):204-08.  
46  
47
- 48 15. Barbee LA, Dhanireddy S, Tat SA, et al. Barriers to Bacterial STI Testing of HIV-Infected  
49  
50 Men who have Sex with Men Engaged in HIV Primary Care. *Sexually transmitted*  
51  
52 *diseases* 2015;**42**(10):590-94.  
53  
54  
55  
56  
57  
58  
59  
60

- 1  
2  
3 16. Denison HJ, Bromhead C, Grainger R, et al. Barriers to sexually transmitted infection testing  
4  
5 in New Zealand: a qualitative study. *Australian and New Zealand journal of public health*  
6  
7 2017;**41**(4):432-37.  
8  
9
- 10 17. Seekaew P, Pengnonyang S, Jantarapakde J, et al. Characteristics and HIV epidemiologic  
11  
12 profiles of men who have sex with men and transgender women in key population-led  
13  
14 test and treat cohorts in Thailand. *PloS one* 2018;**13**(8):e0203294.  
15  
16
- 17 18. Centers for Disease Control and Prevention. Sexually Trasmitted Disease Surveillance 2015.  
18  
19 Atlanta: U.S. Department of Health and Human Services, 2016.  
20  
21
- 22 19. Hiransuthikul A PS, Teeratakulpisarn N, Chamnam P, Pathipvanich P, Thongpaen S,  
23  
24 Pengnonyang S, Trachunthong D, Phanuphak N. Subsequent and Recurrent Sexually  
25  
26 Transmitted Infections among Thai Men Who Have Sex With Men and Transgender  
27  
28 Women in Test and Treat Cohort. Conference on Retroviruses and Oppotunistic  
29  
30 Infections (CROI2017). Seattle, WA.  
31  
32
- 33 20. van Liere GA, Hoebe CJ, Dukers-Muijrers NH. Evaluation of the anatomical site distribution  
34  
35 of chlamydia and gonorrhoea in men who have sex with men and in high-risk women by  
36  
37 routine testing: cross-sectional study revealing missed opportunities for treatment  
38  
39 strategies. *Sexually transmitted infections* 2014;**90**(1):58-60.  
40  
41
- 42 21. Lutz AR. Screening for Asymptomatic Extragenital Gonorrhea and Chlamydia in Men Who  
43  
44 Have Sex with Men: Significance, Recommendations, and Options for Overcoming  
45  
46 Barriers to Testing. *LGBT health* 2015;**2**(1):27-34.  
47  
48
- 49 22. Marcus JL, Bernstein KT, Kohn RP, et al. Infections missed by urethral-only screening for  
50  
51 chlamydia or gonorrhea detection among men who have sex with men. *Sexually*  
52  
53 transmitted diseases 2011;**38**(10):922-4.  
54  
55  
56  
57  
58  
59  
60

- 1  
2  
3 23. Rieg G, Lewis RJ, Miller LG, et al. Asymptomatic sexually transmitted infections in HIV-  
4 infected men who have sex with men: prevalence, incidence, predictors, and screening  
5 strategies. *AIDS patient care and STDs* 2008;**22**(12):947-54.  
6  
7  
8  
9  
10 24. Chow EP, Camilleri S, Ward C, et al. Duration of gonorrhoea and chlamydia infection at the  
11 pharynx and rectum among men who have sex with men: a systematic review. *Sexual*  
12 *health* 2016;**13**(3):199-204.  
13  
14  
15  
16  
17 25. Center for Disease Control and Prevention. Sexually Transmitted Diseases Treatment  
18 Guidelines. *MMWR Recomm Rep* 2015;**64**(3).  
19  
20  
21 26. WHO Guidelines Approved by the Guidelines Review Committee. WHO Guidelines for the  
22 Treatment of *Neisseria gonorrhoeae*. Geneva: World Health Organization 2016.  
23  
24  
25  
26 27. WHO Guidelines Approved by the Guidelines Review Committee. WHO Guidelines for the  
27 Treatment of *Chlamydia trachomatis*. Geneva: World Health Organization 2016.  
28  
29  
30  
31  
32  
33  
34  
35  
36  
37  
38  
39  
40  
41  
42  
43  
44  
45  
46  
47  
48  
49  
50  
51  
52  
53  
54  
55  
56  
57  
58  
59  
60

**Table 1.** Demographic of 1610 men who have sex with men included in the analysis

| Characteristics                                                      | Overall<br>(n=1610) |      | HIV-positive<br>(n=303) |      | HIV-negative<br>(n=1307) |      | p-value |
|----------------------------------------------------------------------|---------------------|------|-------------------------|------|--------------------------|------|---------|
|                                                                      | n                   | %    | n                       | %    | n                        | %    |         |
| <b>Median age (IQR) years</b>                                        | 24.1<br>(20.8-30.0) |      | 24.1<br>(21.0-28.7)     |      | 24.1<br>(20.8-30.5)      |      | 0.48    |
| <b>Site</b>                                                          |                     |      |                         |      |                          |      | <0.001  |
| Bangkok                                                              | 676                 | 42.0 | 164                     | 54.1 | 512                      | 39.2 |         |
| Chiang Mai                                                           | 541                 | 33.6 | 61                      | 20.1 | 480                      | 36.7 |         |
| Hat Yai                                                              | 152                 | 9.4  | 17                      | 5.6  | 135                      | 10.3 |         |
| Pattaya city                                                         | 241                 | 15.0 | 61                      | 20.1 | 180                      | 13.8 |         |
| <b>Marital status</b>                                                |                     |      |                         |      |                          |      | 0.19    |
| Single                                                               | 1158/1598           | 72.5 | 218/301                 | 72.4 | 940/1297                 | 72.5 |         |
| Living together with male partner                                    | 381/1598            | 23.8 | 77/301                  | 25.6 | 304/1297                 | 23.4 |         |
| Married to a woman                                                   | 59/1598             | 3.7  | 6/301                   | 2.0  | 53/1297                  | 4.1  |         |
| <b>Highest education</b>                                             |                     |      |                         |      |                          |      | 0.46    |
| Lower than high school                                               | 325/1594            | 20.4 | 68/299                  | 22.7 | 257/1295                 | 19.9 |         |
| High school                                                          | 638/1594            | 40.0 | 120/299                 | 40.1 | 518/1295                 | 40.0 |         |
| Higher than high school                                              | 631/1594            | 39.6 | 111/299                 | 27.1 | 520/1295                 | 40.2 |         |
| <b>Main occupation</b>                                               |                     |      |                         |      |                          |      | 0.06    |
| Unemployed                                                           | 97/1598             | 6.1  | 25/300                  | 8.3  | 72/1298                  | 5.6  |         |
| Student                                                              | 486/1598            | 30.4 | 76/300                  | 25.3 | 410/1298                 | 31.6 |         |
| Sex worker                                                           | 707/1598            | 44.2 | 133/300                 | 44.3 | 574/1298                 | 44.2 |         |
| Employed, other than sex worker                                      | 308/1598            | 19.3 | 66/300                  | 22.0 | 242/1298                 | 18.6 |         |
| <b>Income &gt;10,000 THB (\$320) per month</b>                       | 672/1383            | 48.6 | 124/264                 | 47.0 | 548/1119                 | 49.0 | 0.56    |
| <b>Median age (IQR) of first sexual intercourse</b>                  | 17<br>(15-19)       |      | 17<br>(15-19)           |      | 17<br>(15-19)            |      | 0.22    |
| <b>Male circumcision</b>                                             | 186/1391            | 13.4 | 25/240                  | 10.4 | 161/1151                 | 14.0 | 0.14    |
| <b>Number of sexual partners in the past 6 months</b>                |                     |      |                         |      |                          |      | 0.34    |
| No sexual partner                                                    | 30/1603             | 1.9  | 7/300                   | 2.3  | 23/1303                  | 1.8  |         |
| Single partner                                                       | 308/1603            | 19.2 | 59/300                  | 19.7 | 249/1303                 | 19.1 |         |
| Multiple partners                                                    | 870/1603            | 54.3 | 150/300                 | 50.0 | 720/1303                 | 55.3 |         |
| Refuse to answer                                                     | 395/1603            | 24.6 | 84/300                  | 28.0 | 311/1303                 | 23.9 |         |
| <b>Self-perceived risk for HIV transmission in the past 6 months</b> |                     |      |                         |      |                          |      | <0.001  |
| No risk                                                              | 161/1589            | 10.1 | 16/296                  | 5.4  | 145/1293                 | 11.2 |         |
| Mild                                                                 | 590/1589            | 37.1 | 85/296                  | 28.7 | 505/1293                 | 39.1 |         |
| Moderate                                                             | 550/1589            | 34.6 | 114/296                 | 38.5 | 436/1293                 | 33.7 |         |
| High                                                                 | 288/1589            | 18.1 | 81/296                  | 27.4 | 207/1293                 | 16.0 |         |
| <b>Unprotected sex in the past 6 months</b>                          | 1261/1586           | 79.5 | 252/298                 | 84.6 | 1009/1288                | 78.3 | 0.02    |
| <b>Illicit drug used in the past 6 months</b>                        | 599/1530            | 39.2 | 100/278                 | 36.0 | 499/1252                 | 39.9 | 0.23    |
| <b>Self-reported STIs in the past 6 months</b>                       |                     |      |                         |      |                          |      | <0.001  |
| No                                                                   | 977/1546            | 63.2 | 146/291                 | 50.2 | 831/1255                 | 66.2 |         |
| Yes                                                                  | 106/1546            | 6.9  | 21/291                  | 7.2  | 85/1255                  | 6.8  |         |
| Not sure                                                             | 463/1546            | 29.9 | 124/291                 | 42.6 | 339/1255                 | 27.0 |         |
| <b>Group sex in the past 6 months</b>                                | 207/1520            | 13.6 | 47/286                  | 16.4 | 160/1234                 | 13.0 | 0.12    |
| <b>Overall CT infections</b>                                         | 349                 | 21.7 | 111                     | 36.6 | 238                      | 18.2 | <0.001  |
| Pharyngeal CT                                                        | 48                  | 3.0  | 17                      | 5.6  | 31                       | 2.4  | 0.003   |
| Rectal CT                                                            | 242                 | 15.0 | 88                      | 29.0 | 154                      | 11.8 | <0.001  |
| Urethral CT                                                          | 112                 | 7.0  | 29                      | 9.6  | 83                       | 6.4  | 0.04    |
| <b>Overall NG infections</b>                                         | 249                 | 15.5 | 91                      | 30.0 | 158                      | 12.1 | <0.001  |
| Pharyngeal NG                                                        | 110                 | 6.8  | 25                      | 8.3  | 85                       | 6.5  | 0.28    |
| Rectal NG                                                            | 150                 | 9.3  | 68                      | 22.4 | 82                       | 6.3  | <0.001  |
| Urethral NG                                                          | 56                  | 3.5  | 22                      | 7.3  | 34                       | 2.6  | <0.001  |

Abbreviations: CT, *Chlamydia trachomatis*; NG, *Neisseria gonorrhoeae*; STIs, Sexually transmitted infections

**Table 2.** Prevalence of CT/NG infections at the remaining 2 sites among men who have sex with men who had negative result at pharyngeal, rectal, and urethral site, respectively.

| Negative site       | Positive site                  | Prevalence (95%CI) |                  |                  | p-value |
|---------------------|--------------------------------|--------------------|------------------|------------------|---------|
|                     |                                | Overall            | HIV-positive     | HIV-negative     |         |
| Pharyngeal (n=1460) | Rectal (n=246)                 | 16.9 (15.0-18.9)   | 34.1 (28.4-40.2) | 13.0 (11.2-15.1) | <0.001  |
|                     | Urethral (n=129)               | 8.8 (7.4-10.4)     | 13.6 (9.7-18.4)  | 7.8 (6.3-9.4)    | 0.002   |
|                     | Rectal or urethral (n=331)     | 22.7 (20.6-24.9)   | 41.3 (35.3-47.5) | 18.6 (16.4-20.9) | <0.001  |
| Rectal (n=1295)     | Pharyngeal (n=81)              | 6.3 (5.0-7.7)      | 8.9 (5.3-13.9)   | 5.8 (4.5-7.3)    | 0.10    |
|                     | Urethral (n=96)                | 7.4 (6.1-9.0)      | 10.5 (6.5-15.7)  | 6.9 (5.5-8.5)    | 0.08    |
|                     | Pharyngeal or urethral (n=166) | 12.8 (11.1-14.8)   | 18.8 (13.6-25.1) | 11.8 (9.9-13.8)  | 0.01    |
| Urethral (n=1455)   | Pharyngeal (n=124)             | 8.5 (7.1-10.2)     | 11.6 (8.0-16.2)  | 7.7 (6.4-9.5)    | 0.049   |
|                     | Rectal (n=256)                 | 17.6 (15.7-19.7)   | 33.7 (28.0-39.8) | 14.1 (12.2-16.2) | <0.001  |
|                     | Pharyngeal or rectal (n=326)   | 22.4 (20.3-24.6)   | 40.0 (33.9-46.2) | 18.6 (16.5-21.0) | <0.001  |

Abbreviations: CT, *Chlamydia trachomatis*; NG, *Neisseria gonorrhoeae*

**Table 3.** Factors associated with CT/NG infections at the remaining 2 sites among men who have sex with men who tested negative at pharyngeal, rectal, and urethral sites, respectively

| Variable                                                                      | Negative at the pharyngeal site<br>(n=1460) |                |                | Negative at the rectal site<br>(n=1295) |               |                | Negative at the urethral site<br>(n=1455) |                |                |
|-------------------------------------------------------------------------------|---------------------------------------------|----------------|----------------|-----------------------------------------|---------------|----------------|-------------------------------------------|----------------|----------------|
|                                                                               | Rectal                                      | Urethral       |                | Pharyngeal                              | Urethral      |                | Pharyngeal                                | Rectal         |                |
| <b>Site of infection</b>                                                      |                                             |                |                |                                         |               |                |                                           |                |                |
| <b>Number (%) of infected participants</b>                                    | 246 (16.9%)                                 | 129 (8.8%)     |                | 81 (6.3%)                               | 96 (7.4%)     |                | 124 (8.5%)                                | 256 (17.6%)    |                |
| <b>Covariates</b>                                                             | n (%)                                       | aOR (95%CI)    | aOR (95%CI)    | n (%)                                   | aOR (95%CI)   | aOR (95%CI)    | n (%)                                     | aOR (95%CI)    |                |
| <b>HIV-positive</b>                                                           | 264 (18.1)                                  | 2.9 (2.1-4.1)* | 1.9 (1.2-3.1)* | 191 (14.8)                              | 1.6 (0.9-2.8) | 1.9 (1.1-3.5)* | 258 (17.7)                                | 1.4 (0.9-2.2)  | 3.0 (2.1-4.1)* |
| <b>Age ≤25 years</b>                                                          | 801 (54.9)                                  | 1.7 (1.2-2.3)* |                | 686 (53.0)                              |               |                | 801 (55.1)                                |                | 1.5 (1.1-2.1)* |
| <b>Site: Bangkok</b>                                                          | 610 (41.8)                                  |                | 1.7 (1.1-2.7)* | 538 (41.5)                              |               | 1.8 (1.1-3.0)* | 597 (41.0)                                |                |                |
| <b>Marital status: Single</b>                                                 | 1048 (72.3)                                 | 1.2 (0.9-1.8)  |                | 910 (70.8)                              |               | 1.5 (0.9-2.7)  | 1047 (72.5)                               |                | 1.7 (1.2-2.5)* |
| <b>Education: High school or lower</b>                                        | 870 (60.3)                                  | 1.2 (0.8-1.6)  |                | 756 (58.8)                              |               |                | 862 (59.8)                                |                | 1.3 (0.0-1.7)  |
| <b>Self-perceived risk for HIV transmission in the past 6 months</b>          |                                             |                |                |                                         |               |                |                                           |                |                |
| No risk/Mild                                                                  | 690 (48.0)                                  |                | Ref            | 619 (48.4)                              |               | Ref            | 688 (47.8)                                |                | Ref            |
| Moderate                                                                      | 493 (34.3)                                  | 0.9 (0.7-1.4)  |                | 447 (35.0)                              | 1.6 (0.9-2.7) |                | 496 (34.5)                                | 1.2 (0.7-2.1)  | 0.9 (0.7-1.3)  |
| High                                                                          | 256 (17.8)                                  | 1.4 (0.9-2.2)  |                | 213 (16.7)                              | 1.5 (0.8-2.9) |                | 254 (17.7)                                | 1.7 (0.9-3.0)  | 1.2 (0.8-1.8)  |
| <b>Number of sexual partners in the past 6 months</b>                         |                                             |                |                |                                         |               |                |                                           |                |                |
| No or single partner                                                          | 314 (21.6)                                  |                | Ref            | 127 (21.9)                              |               | Ref            | 316 (21.8)                                |                | Ref            |
| Multiple partners                                                             | 792 (54.5)                                  | 1.4 (0.9-2.2)  | 1.2 (0.7-2.3)  | 700 (54.3)                              | 0.9 (0.5-1.8) | 1.2 (0.6-2.4)  | 781 (53.9)                                |                | 1.3 (0.9-2.0)  |
| Refuse to answer                                                              | 347 (23.9)                                  | 1.8 (1.1-2.9)* | 1.5 (0.8-3.0)  | 301 (23.4)                              | 1.8 (0.9-3.5) | 1.4 (0.6-3.0)  | 352 (24.3)                                |                | 1.6 (1.1-2.6)* |
| <b>Male circumcision</b>                                                      | 170 (13.5)                                  |                | 0.7 (0.3-1.4)  | 156 (13.7)                              |               | 0.7 (0.3-1.5)  | 173 (13.8)                                |                |                |
| <b>Unprotected sex in the past 6 months</b>                                   | 1138 (79.1)                                 | 1.3 (0.8-1.9)  | 2.0 (1.1-3.9)* | 1003 (78.7)                             |               | 1.6 (0.8-3.2)  | 1125 (78.5)                               | 1.4 (0.8-2.4)  |                |
| <b>Illicit drug used in the past 6 months</b>                                 | 552 (39.7)                                  |                | 1.4 (0.9-2.1)  | 483 (39.0)                              |               | 1.4 (0.8-2.3)  | 524 (37.8)                                | 0.6 (0.4-1.0)  |                |
| <b>Had any symptoms or being diagnosed with any STIs in the past 6 months</b> |                                             |                |                |                                         |               |                |                                           |                |                |
| No                                                                            | 893 (63.7)                                  |                | Ref            | 806 (64.6)                              |               | Ref            | 904 (64.4)                                |                | Ref            |
| Yes                                                                           | 94 (6.7)                                    | 1.1 (0.6-2.0)  | 2.3 (1.2-4.4)* | 81 (6.5)                                |               | 1.6 (0.7-3.5)  | 85 (6.1)                                  |                |                |
| Not sure                                                                      | 414 (29.6)                                  | 0.9 (0.7-1.3)  | 1.1 (0.6-1.7)  | 360 (28.9)                              |               | 0.9 (0.5-1.6)  | 415 (29.6)                                |                |                |
| <b>Had group sex in the past 6 months</b>                                     | 178 (12.9)                                  | 1.9 (1.3-3.0)* | 1.3 (0.7-2.2)  | 146 (12.0)                              | 1.6 (0.8-3.1) | 0.9 (0.5-1.9)  | 177 (12.9)                                | 2.0 (1.2-3.4)* | 1.9 (1.3-2.8)* |

Abbreviations: CT, *Chlamydia trachomatis*; NG, *Neisseria gonorrhoeae*; STIs, Sexually transmitted infections

Multivariate logistic regression is based on covariates associated with outcomes in univariate regression with p-value of <0.2

\* indicates p-value < 0.05

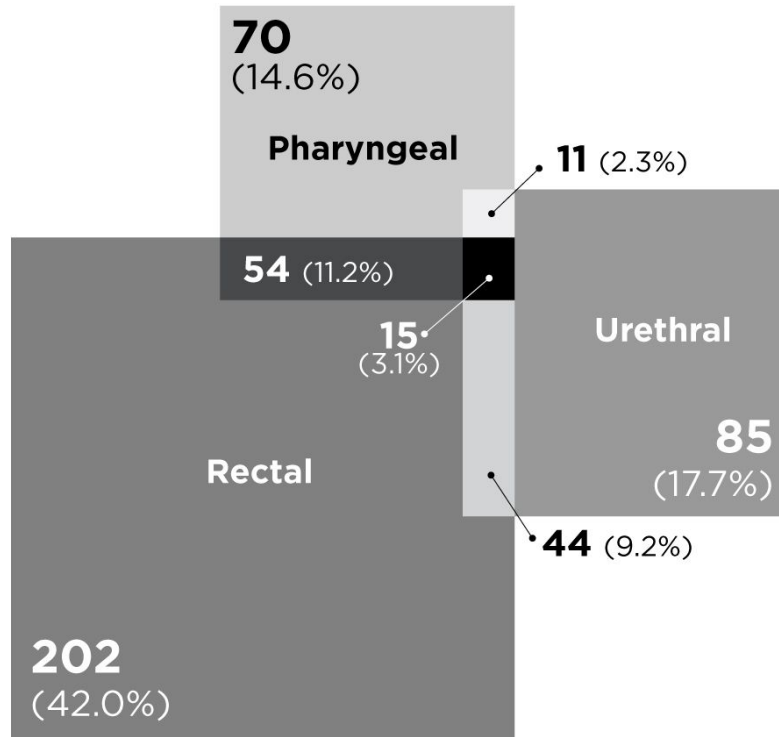

| Type(s) of infection    | No. of participants (%) with CT/NG infections |                     |                       |
|-------------------------|-----------------------------------------------|---------------------|-----------------------|
|                         | Pharyngeal<br>(n = 150)                       | Rectal<br>(n = 315) | Urethral<br>(n = 155) |
| <b>Isolated site</b>    | 70 (46.7)                                     | 202 (64.1)          | 85 (54.8)             |
| <b>Multiple sites</b>   |                                               |                     |                       |
| Pharyngeal and rectal   | 54 (36)                                       | 54 (17.1)           | -                     |
| Pharyngeal and urethral | 11 (7.3)                                      | -                   | 11 (7.1)              |
| Rectal and urethral     | -                                             | 44 (14.0)           | 44 (28.4)             |
| All 3 sites             | 15 (10)                                       | 15 (4.8)            | 15 (9.7)              |

Abbreviations: CT, *Chlamydia trachomatis*; NG, *Neisseria gonorrhoeae*

**Figure 1.** Distribution of CT/NG infections by anatomical site.



### Supplementary File 1. Demographic of all men who have sex with men enrolled in the Community-based Test and Treat Cohort

| Characteristics                                                      | Overall (n=1858)    |      | MSM who were included in the analysis (completed 3 sites CT/NG screening) (n=1610) |      | MSM who were excluded from the analysis (did not complete 3 sites CT/NG screening) (n=248) |      | p-value |
|----------------------------------------------------------------------|---------------------|------|------------------------------------------------------------------------------------|------|--------------------------------------------------------------------------------------------|------|---------|
|                                                                      | n                   | %    | n                                                                                  | %    | n                                                                                          | %    |         |
| <b>Median age (IQR) years</b>                                        | 24.2<br>(20.9-30.2) |      | 24.1<br>(20.8-30.0)                                                                |      | 24.4<br>(21.4-31.9)                                                                        |      | 0.09    |
| <b>Site</b>                                                          |                     |      |                                                                                    |      |                                                                                            |      | <0.001  |
| Bangkok                                                              | 824                 | 44.4 | 676                                                                                | 42.0 | 148                                                                                        | 59.7 |         |
| Chiang Mai                                                           | 564                 | 30.4 | 541                                                                                | 33.6 | 23                                                                                         | 9.3  |         |
| Hat Yai                                                              | 216                 | 11.6 | 152                                                                                | 9.4  | 64                                                                                         | 25.8 |         |
| Pattaya city                                                         | 254                 | 13.7 | 241                                                                                | 15.0 | 13                                                                                         | 5.2  |         |
| <b>Marital status</b>                                                |                     |      |                                                                                    |      |                                                                                            |      | <0.001  |
| Single                                                               | 1319/1845           | 71.5 | 1158/1598                                                                          | 72.5 | 161/247                                                                                    | 65.2 |         |
| Living together with male partner                                    | 434/1845            | 23.5 | 381/1598                                                                           | 23.8 | 53/247                                                                                     | 21.5 |         |
| Married to a woman                                                   | 92/1845             | 5.0  | 59/1598                                                                            | 3.7  | 33/247                                                                                     | 13.4 |         |
| <b>Highest education</b>                                             |                     |      |                                                                                    |      |                                                                                            |      | 0.003   |
| Lower than high school                                               | 392/1838            | 21.3 | 325/1594                                                                           | 20.4 | 67/244                                                                                     | 27.5 |         |
| High school                                                          | 710/1838            | 38.6 | 638/1594                                                                           | 40.0 | 72/244                                                                                     | 29.5 |         |
| Higher than high school                                              | 736/1838            | 40.1 | 631/1594                                                                           | 39.6 | 105/244                                                                                    | 43.0 |         |
| <b>Main occupation</b>                                               |                     |      |                                                                                    |      |                                                                                            |      | 0.13    |
| Unemployed                                                           | 116/1843            | 6.3  | 97/1598                                                                            | 6.1  | 19/245                                                                                     | 7.8  |         |
| Student                                                              | 547/1843            | 29.7 | 486/1598                                                                           | 30.4 | 61/245                                                                                     | 24.9 |         |
| Sex worker                                                           | 367/1843            | 19.9 | 707/1598                                                                           | 44.2 | 106/245                                                                                    | 43.3 |         |
| Employed, other than sex worker                                      | 813/1843            | 44.1 | 308/1598                                                                           | 19.3 | 59/245                                                                                     | 24.1 |         |
| <b>Income &gt;10,000 THB (\$320) per month</b>                       | 792/1594            | 49.7 | 672/1383                                                                           | 48.6 | 120/211                                                                                    | 56.9 | 0.03    |
| <b>Median age (IQR) of first sexual intercourse</b>                  | 17<br>(15-19)       |      | 17<br>(15-19)                                                                      |      | 17<br>(15-19)                                                                              |      | 0.46    |
| <b>Male circumcision</b>                                             | 213/1603            | 13.3 | 186/1391                                                                           | 13.4 | 27/212                                                                                     | 12.7 | 0.80    |
| <b>Number of sexual partners in the past 6 months</b>                |                     |      |                                                                                    |      |                                                                                            |      | 0.27    |
| No sexual partner                                                    | 39/1851             | 2.1  | 30/1603                                                                            | 1.9  | 9                                                                                          | 3.6  |         |
| Single partner                                                       | 353/1851            | 19.1 | 308/1603                                                                           | 19.2 | 45                                                                                         | 18.2 |         |
| Multiple partners                                                    | 1009/1851           | 54.5 | 870/1603                                                                           | 54.3 | 139                                                                                        | 56.1 |         |
| Refuse to answer                                                     | 450/1851            | 24.3 | 395/1603                                                                           | 24.6 | 55                                                                                         | 22.2 |         |
| <b>Self-perceived risk for HIV transmission in the past 6 months</b> |                     |      |                                                                                    |      |                                                                                            |      | 0.02    |
| No risk                                                              | 197/1835            | 10.7 | 161/1589                                                                           | 10.1 | 36/246                                                                                     | 14.6 |         |
| Mild                                                                 | 693/1835            | 37.8 | 590/1589                                                                           | 37.1 | 103/246                                                                                    | 41.9 |         |
| Moderate                                                             | 614/1835            | 33.5 | 550/1589                                                                           | 34.6 | 64/246                                                                                     | 26.0 |         |
| High                                                                 | 331/1835            | 18.0 | 288/1589                                                                           | 18.1 | 43/246                                                                                     | 17.5 |         |
| <b>Unprotected sex in the past 6 months</b>                          | 1432/1831           | 78.2 | 1261/1586                                                                          | 79.5 | 171/245                                                                                    | 69.8 | 0.001   |
| <b>Illicit drug used in the past 6 months</b>                        | 685/1765            | 38.8 | 599/1530                                                                           | 39.2 | 86/235                                                                                     | 36.6 | 0.45    |
| <b>Self-reported STIs in the past 6 months</b>                       |                     |      |                                                                                    |      |                                                                                            |      | 0.007   |
| No                                                                   | 1157/1788           | 64.7 | 977/1546                                                                           | 63.2 | 180/242                                                                                    | 74.4 |         |
| Yes                                                                  | 119/1788            | 6.7  | 106/1546                                                                           | 6.9  | 13/242                                                                                     | 5.4  |         |
| Not sure                                                             | 512/1788            | 28.6 | 463/1546                                                                           | 29.9 | 49/242                                                                                     | 20.2 |         |
| <b>Group sex in the past 6 months</b>                                | 217/1747            | 12.4 | 207/1520                                                                           | 13.6 | 10/227                                                                                     | 4.4  | <0.001  |
| <b>Overall CT infections</b>                                         | 379/1842            | 20.6 | 349                                                                                | 21.7 | 30/232                                                                                     | 12.9 | 0.002   |
| Pharyngeal CT                                                        | 54/1840             | 2.9  | 48                                                                                 | 3.0  | 6/230                                                                                      | 2.6  | 0.75    |
| Rectal CT                                                            | 245/1617            | 15.2 | 242                                                                                | 15.0 | 3/7                                                                                        | 42.9 | 0.04    |
| Urethral CT                                                          | 133/1833            | 7.3  | 112                                                                                | 7.0  | 21/223                                                                                     | 9.4  | 0.18    |
| <b>Overall NG infections</b>                                         | 267/1842            | 14.5 | 249                                                                                | 15.5 | 18/232                                                                                     | 7.8  | 0.002   |
| Pharyngeal NG                                                        | 120/1840            | 6.5  | 110                                                                                | 6.8  | 10/230                                                                                     | 4.4  | 0.15    |
| Rectal NG                                                            | 151/1617            | 9.3  | 150                                                                                | 9.3  | 1/7                                                                                        | 14.3 | 0.65    |
| Urethral NG                                                          | 64/1833             | 3.5  | 56                                                                                 | 3.5  | 8/223                                                                                      | 3.6  | 0.93    |

Abbreviations: CT, *Chlamydia trachomatis*; NG, *Neisseria gonorrhoeae*; STIs, sexually transmitted infections

STROBE Statement—Checklist of items that should be included in reports of *cohort studies*

|                              | Item No | Recommendation                                                                                                                                                                                                                                                                                                         | Page No |
|------------------------------|---------|------------------------------------------------------------------------------------------------------------------------------------------------------------------------------------------------------------------------------------------------------------------------------------------------------------------------|---------|
| <b>Title and abstract</b>    | 1       | (a) Indicate the study's design with a commonly used term in the title or the abstract<br>(b) Provide in the abstract an informative and balanced summary of what was done and what was found                                                                                                                          | 1       |
| <b>Introduction</b>          |         |                                                                                                                                                                                                                                                                                                                        |         |
| Background/rationale         | 2       | Explain the scientific background and rationale for the investigation being reported                                                                                                                                                                                                                                   | 4       |
| Objectives                   | 3       | State specific objectives, including any prespecified hypotheses                                                                                                                                                                                                                                                       | 5       |
| <b>Methods</b>               |         |                                                                                                                                                                                                                                                                                                                        |         |
| Study design                 | 4       | Present key elements of study design early in the paper                                                                                                                                                                                                                                                                | 6       |
| Setting                      | 5       | Describe the setting, locations, and relevant dates, including periods of recruitment, exposure, follow-up, and data collection                                                                                                                                                                                        | 6       |
| Participants                 | 6       | (a) Give the eligibility criteria, and the sources and methods of selection of participants. Describe methods of follow-up<br>(b) For matched studies, give matching criteria and number of exposed and unexposed                                                                                                      | 6       |
| Variables                    | 7       | Clearly define all outcomes, exposures, predictors, potential confounders, and effect modifiers. Give diagnostic criteria, if applicable                                                                                                                                                                               | 7       |
| Data sources/<br>measurement | 8*      | For each variable of interest, give sources of data and details of methods of assessment (measurement). Describe comparability of assessment methods if there is more than one group                                                                                                                                   | 7       |
| Bias                         | 9       | Describe any efforts to address potential sources of bias                                                                                                                                                                                                                                                              | -       |
| Study size                   | 10      | Explain how the study size was arrived at                                                                                                                                                                                                                                                                              | -       |
| Quantitative variables       | 11      | Explain how quantitative variables were handled in the analyses. If applicable, describe which groupings were chosen and why                                                                                                                                                                                           | 7       |
| Statistical methods          | 12      | (a) Describe all statistical methods, including those used to control for confounding<br>(b) Describe any methods used to examine subgroups and interactions<br>(c) Explain how missing data were addressed<br>(d) If applicable, explain how loss to follow-up was addressed<br>(e) Describe any sensitivity analyses | 7       |
| <b>Results</b>               |         |                                                                                                                                                                                                                                                                                                                        |         |
| Participants                 | 13*     | (a) Report numbers of individuals at each stage of study—eg numbers potentially eligible, examined for eligibility, confirmed eligible, included in the study, completing follow-up, and analysed<br>(b) Give reasons for non-participation at each stage<br>(c) Consider use of a flow diagram                        | 7       |
| Descriptive data             | 14*     | (a) Give characteristics of study participants (eg demographic, clinical, social) and information on exposures and potential confounders<br>(b) Indicate number of participants with missing data for each variable of interest<br>(c) Summarise follow-up time (eg, average and total amount)                         | 7       |
| Outcome data                 | 15*     | Report numbers of outcome events or summary measures over time                                                                                                                                                                                                                                                         | 8       |

|    |                          |    |                                                                                                                                                                                                              |    |
|----|--------------------------|----|--------------------------------------------------------------------------------------------------------------------------------------------------------------------------------------------------------------|----|
| 1  | Main results             | 16 | (a) Give unadjusted estimates and, if applicable, confounder-adjusted estimates and their precision (eg, 95% confidence interval). Make clear which confounders were adjusted for and why they were included | 8  |
| 2  |                          |    | (b) Report category boundaries when continuous variables were categorized                                                                                                                                    |    |
| 3  |                          |    | (c) If relevant, consider translating estimates of relative risk into absolute risk for a meaningful time period                                                                                             |    |
| 4  |                          |    |                                                                                                                                                                                                              |    |
| 5  |                          |    |                                                                                                                                                                                                              |    |
| 6  |                          |    |                                                                                                                                                                                                              |    |
| 7  |                          |    |                                                                                                                                                                                                              |    |
| 8  |                          |    |                                                                                                                                                                                                              |    |
| 9  | Other analyses           | 17 | Report other analyses done—eg analyses of subgroups and interactions, and sensitivity analyses                                                                                                               | -  |
| 10 |                          |    |                                                                                                                                                                                                              |    |
| 11 | <b>Discussion</b>        |    |                                                                                                                                                                                                              |    |
| 12 |                          |    |                                                                                                                                                                                                              |    |
| 13 | Key results              | 18 | Summarise key results with reference to study objectives                                                                                                                                                     | 10 |
| 14 | Limitations              | 19 | Discuss limitations of the study, taking into account sources of potential bias or imprecision. Discuss both direction and magnitude of any potential bias                                                   | 12 |
| 15 |                          |    |                                                                                                                                                                                                              |    |
| 16 | Interpretation           | 20 | Give a cautious overall interpretation of results considering objectives, limitations, multiplicity of analyses, results from similar studies, and other relevant evidence                                   | 10 |
| 17 |                          |    |                                                                                                                                                                                                              |    |
| 18 |                          |    |                                                                                                                                                                                                              |    |
| 19 | Generalisability         | 21 | Discuss the generalisability (external validity) of the study results                                                                                                                                        | 12 |
| 20 |                          |    |                                                                                                                                                                                                              |    |
| 21 | <b>Other information</b> |    |                                                                                                                                                                                                              |    |
| 22 | Funding                  | 22 | Give the source of funding and the role of the funders for the present study and, if applicable, for the original study on which the present article is based                                                | 14 |
| 23 |                          |    |                                                                                                                                                                                                              |    |
| 24 |                          |    |                                                                                                                                                                                                              |    |

25  
26 \*Give information separately for exposed and unexposed groups.

27  
28 **Note:** An Explanation and Elaboration article discusses each checklist item and gives methodological background and  
29 published examples of transparent reporting. The STROBE checklist is best used in conjunction with this article (freely  
30 available on the Web sites of PLoS Medicine at <http://www.plosmedicine.org/>, Annals of Internal Medicine at  
31 <http://www.annals.org/>, and Epidemiology at <http://www.epidem.com/>). Information on the STROBE Initiative is  
32 available at <http://www.strobe-statement.org>.  
33  
34  
35  
36  
37  
38  
39  
40  
41  
42  
43  
44  
45  
46  
47  
48  
49  
50  
51  
52  
53  
54  
55  
56  
57  
58  
59  
60

# BMJ Open

## Correlations of chlamydia and gonorrhoea between pharyngeal, rectal, and urethral sites among Thai men who have sex with men: a multicentre community-led test and treat cohort in Thailand

|                                 |                                                                                                                                                                                                                                                                                                                                                                                                                                                                                                                                                                                           |
|---------------------------------|-------------------------------------------------------------------------------------------------------------------------------------------------------------------------------------------------------------------------------------------------------------------------------------------------------------------------------------------------------------------------------------------------------------------------------------------------------------------------------------------------------------------------------------------------------------------------------------------|
| Journal:                        | <i>BMJ Open</i>                                                                                                                                                                                                                                                                                                                                                                                                                                                                                                                                                                           |
| Manuscript ID                   | bmjopen-2018-028162.R1                                                                                                                                                                                                                                                                                                                                                                                                                                                                                                                                                                    |
| Article Type:                   | Research                                                                                                                                                                                                                                                                                                                                                                                                                                                                                                                                                                                  |
| Date Submitted by the Author:   | 30-May-2019                                                                                                                                                                                                                                                                                                                                                                                                                                                                                                                                                                               |
| Complete List of Authors:       | Hiransuthikul, Akarin; PREVENTION, Thai Red Cross AIDS Research Centre<br>Sungsing, Thanthip; PREVENTION, Thai Red Cross AIDS Research Centre<br>Jantarapakde, Jureeporn; PREVENTION, Thai Red Cross AIDS Research Centre<br>Trachunthong, Deondara; PREVENTION, Thai Red Cross AIDS Research Centre<br>Mills, Stephen; LINKAGES Thailand FHI360<br>Vannakit, Ravipa; Office of Public Health, United States Agency for International Development<br>Phanuphak, P; PREVENTION, Thai Red Cross AIDS Research Centre<br>Phanuphak, Nittaya; PREVENTION, Thai Red Cross AIDS Research Centre |
| <b>Primary Subject Heading</b>: | Epidemiology                                                                                                                                                                                                                                                                                                                                                                                                                                                                                                                                                                              |
| Secondary Subject Heading:      | HIV/AIDS                                                                                                                                                                                                                                                                                                                                                                                                                                                                                                                                                                                  |
| Keywords:                       | HIV & AIDS < INFECTIOUS DISEASES, Men who have sex with men, Chlamydia trachomatis, Neisseria gonorrhoeae                                                                                                                                                                                                                                                                                                                                                                                                                                                                                 |
|                                 |                                                                                                                                                                                                                                                                                                                                                                                                                                                                                                                                                                                           |

SCHOLARONE™  
Manuscripts

**TITLE PAGE**

**Title:** Correlations of chlamydia and gonorrhoea between pharyngeal, rectal, and urethral sites among Thai men who have sex with men: a multicentre community-led test and treat cohort in Thailand

**Running head:** Anatomical site correlations of CT/NG infections among MSM

**Authors:** Akarin Hiransuthikul, MD<sup>1</sup>, Thanthip Sungsing, MSc<sup>1</sup>, Jureeporn Jantarapakde, MSc<sup>1</sup>, Deondara Trachunthong, MSc<sup>1</sup>, Stephen Mills, PhD<sup>2</sup>, Ravipa Vannakit, MSPH<sup>3</sup>, Praphan Phanuphak, MD, PhD<sup>1</sup>, Nittaya Phanuphak, MD, PhD<sup>1</sup>

**Affiliations:**

<sup>1</sup> PREVENTION, Thai Red Cross AIDS Research Centre, Bangkok, Thailand

<sup>2</sup> LINKAGES Thailand FHI360, Bangkok, Thailand

<sup>3</sup> Office of Public Health, United States Agency for International Development, Bangkok, Thailand

**Correspondence:** Akarin Hiransuthikul, The Thai Red Cross AIDS Research Centre, 104

Ratchadamri Road, Pathumwan, Bangkok, Thailand 10330. E-mail: ahiransuthikul@gmail.com

**Word counts:** 2625/4000

**Tables/Figures:** 5/5

**Conflict of interest:** The authors declared no conflict of interest relevant to this work

**ABSTRACT** (298/300)

Objective: Routine screening for *Chlamydia trachomatis* (CT) and *Neisseria gonorrhoeae* (NG) infections in sexually exposed anatomical sites may be challenging in resource-limited settings.

The objective of this study was to determine the proportion of missed CT/NG diagnoses if a single anatomical site screening was performed among men who have sex with men (MSM) by examining the pattern of anatomical sites of CT/NG infections.

Methods: Thai MSM were enrolled to the community-led test and treat cohort. Screening for CT/NG infections was performed from pharyngeal swab, rectal swab, and urine using nucleic acid amplification testing. The correlations of CT/NG among the three anatomical sites were analyzed.

Results: Among 1610 MSM included in the analysis, 21.7% had CT and 15.5% had NG infection at any anatomical site. Among those tested negative for CT or NG infection at either pharyngeal, rectal, or urethral site, 8-19% had CT infection and 7-12% had NG infection at the remaining two sites. Of the total 349 CT infections, 85.9%, 30.6%, and 67.8% would have been missed if only pharyngeal, rectal, or urethral screening was performed, respectively. Of the total 249 NG infection, 55.7%, 39.6%, and 77.4% would have been missed if only pharyngeal, rectal, or urethral screening was performed, respectively. The majority of each anatomical site of CT/NG infection were isolated to their respective site, with rectal site having the highest proportion of isolation: 78.9% of rectal CT and 62.7% of rectal NG infection.

Conclusions: A high proportion of CT/NG infections would be missed if single anatomical site screening was performed among MSM. All-site screening is highly recommended, but if not feasible, rectal screening provides the highest yield of CT/NG diagnoses. Effort in lowering the

1  
2  
3 cost of the CT/NG screening test or developing affordable molecular technologies for CT/NG  
4  
5 detection is needed for MSM in resource-limited settings.  
6  
7  
8  
9  
10

### 11 **Strengths and limitations of this study**

- 14 - The study includes a large number of sexually active MSM who completed CT/GC  
15 screening in all three anatomical sites based on their self-reported sexually exposed  
16 contact routes.  
17  
18
- 21 - Correlations of CT/NG infections between pharyngeal, rectal, and urethral sites among  
22 sexually active MSM were identified, and showed the proportion of missed diagnoses if  
23 single anatomical site screening was performed.  
24  
25
- 28 - Because CT/NG screening in our study were based on self-reported sexually exposed  
29 contact routes, we were unable to compare the performance between a history-based and  
30 universal approach.  
31  
32
- 35 - Extra-genitalia samples from a modest number of participants may have been missed due  
36 to social desirability bias regarding questions about the site(s) of sexual contact.  
37  
38  
39  
40  
41  
42  
43  
44  
45  
46  
47  
48  
49  
50  
51  
52  
53  
54  
55  
56  
57  
58  
59  
60

## MAIN TEXT

### Introduction

*Chlamydia trachomatis* (CT) and *Neisseria gonorrhoeae* (NG) infections are among the most common bacterial sexually transmitted infections (STIs) and disproportionately affect men who have sex with men (MSM) worldwide.<sup>1</sup> Two large studies conducted in Thailand between 2006 and 2010 showed that MSM had approximately 30% higher prevalence of CT infection and up to 5 times higher prevalence of NG infection compared to men who have sex exclusively with women.<sup>2,3</sup>

CT/NG infections are associated with acquiring and transmitting HIV infection.<sup>4</sup> In particular, rectal CT/NG infection is strongly associated with an increased risk of HIV acquisition among MSM.<sup>5,6</sup> And while the impact of pharyngeal infection towards HIV acquisition is less understood, it is highly prevalent and may, therefore, serve as an important for infection at genital sites.<sup>7-9</sup> Since CT/NG infections are often asymptomatic,<sup>10</sup> the lack of routine screening may result in a missed opportunity to diagnosis these curable STIs.

The diagnosis of CT/NG infections, both at genital and extra-genital sites, can be made using nucleic acid amplification tests (NAATs). Many studies have shown superior sensitivity and specificity of NAATs in detecting extra-genital CT/NG infection compared to culture.<sup>11-14</sup> The findings prompted the US Center for Disease Control and Prevention (CDC) to recommend the use of NAATs for pharyngeal and rectal CT/NG screening,<sup>15</sup> although they have not been cleared by the US Food and Drug Administration.

Frequency of testing and anatomical sites to be tested are the two factors to consider in asymptomatic CT/NG screening. The Centers for Disease Control and Prevention STD treatment



1  
2  
3 guideline recommends that all sexually active MSM should be screened at least annually at sites  
4  
5 of contact regardless of condom use.<sup>15</sup> More frequent screening is advised if the individuals are  
6  
7 at increased risk. Conversely, the Australian STI management guideline recommends screening  
8  
9 at all sites regardless of sexually exposed contact routes.<sup>16</sup> However, many barriers prevent the  
10  
11 implementation of these recommendations in clinical practice. For the clients, these barriers may  
12  
13 include the cost of tests, underestimating the risk of asymptomatic infections, and concern of  
14  
15 being stigmatized.<sup>17 18</sup> Healthcare providers also often lack knowledge on the importance of STI  
16  
17 screening at appropriate anatomical sites,<sup>17</sup> which may also be the case in Thailand where there  
18  
19 are currently no consensus recommendations for CT/NG screening.  
20  
21  
22

23  
24 Our primary objective was to determine the proportion of missed CT/NG diagnoses if a  
25  
26 single anatomical site screening was performed among men who have sex with men (MSM) by  
27  
28 examining the pattern of anatomical sites of CT/NG infections. Other objectives were to  
29  
30 determine the prevalence of CT/NG infections among MSM enrolled in the community-led test  
31  
32 and treat cohort and to examine the prevalence of CT/NG infections in the remaining two  
33  
34 anatomical sites if one site was negative to evaluate the proportion of missed diagnoses per  
35  
36 individual. The findings from our study will be crucial in guiding the recommendations for  
37  
38 CT/NG screening among MSM, both in HIV treatment and prevention programs, in resource-  
39  
40 limited settings.  
41  
42  
43  
44  
45  
46  
47  
48  
49  
50  
51  
52  
53  
54  
55  
56  
57  
58  
59  
60

## Methods

### *Enrollment of participants*

The present study used data from MSM participants enrolled in the community-led test and treat cohort between October 2015 and October 2016. The community-led test and treat cohort aimed to evaluate the feasibility of empowering lay providers who are members of MSM and transgender women (TGW) communities to provide HIV-related services, increasing uptake of HIV testing and treatment services among MSM and TGW in Thailand.

Eligible criteria and study procedures for the community-led test and treat cohort have been reported in detail elsewhere.<sup>19</sup> In brief, adults Thai MSM and TGW with a history of at least one unprotected anal sexual intercourse with a man in the past 6 months were enrolled from Service Workers IN Group (SWING) drop-in centers (DICs) in Bangkok and Pattaya city, Rainbow Sky Association of Thailand (RSAT) DICs in Bangkok and Songkhla, Caremat DIC in Chiang Mai, and Sisters DIC in Pattaya city, Thailand for an 18-month follow-up period. Only participants of unknown HIV-status were enrolled, and those with known HIV infection were excluded from enrollment. Screening for CT and NG was performed at enrollment using nucleic acid amplification testing (NAAT, Abbott Real Time CT/NG, Abbott Molecular Inc., Illinois, USA) from pharyngeal swab, rectal swab, and/or urine collection based on the self-report sexually exposed contact routes. Participants who completed both CT and NG screening in all three anatomical sites at baseline were included in this analysis.

The study (NCT03580512) was approved by the institutional review boards of the Faculty of Medicine, Chulalongkorn University (IRB No. 181/57), the Department of Disease Control, Thai Ministry of Public Health (IRB No. 9/57-678), the Provincial Health Offices of

1  
2  
3 Chonburi (IRB No. 0032.003/658), Songkhla (IRB No. 075/2014), and Chiang Mai (IRB No.  
4  
5 0032.002/35859). All participants gave informed consent.  
6  
7

### 8 *Statistical Analysis* 9

10  
11 Statistical analysis was performed using Stata 13 (StataCorp LP, College Station, TX,  
12  
13 USA). Demographic, CT/NG and HIV testing results, and sexual risk behaviors were  
14  
15 summarized as median (interquartile range [IQR]) and number (percentage) for continuous and  
16  
17 categorical variables, respectively. Characteristics between HIV-positive and HIV-negative  
18  
19 participants were compared using a chi-square or Fisher's exact test, or Mann-Whitney test as  
20  
21 appropriate.  
22  
23  
24  
25

26 The distribution of anatomical sites of CT/NG infections at baseline was analyzed to  
27  
28 determine the proportion (prevalence with 95%CI) of missed CT/NG diagnoses per individual if  
29  
30 single anatomical site screening was performed, pattern of anatomical distribution for all CT/NG  
31  
32 infections, and pattern of anatomical distribution of CT/NG infections by anatomical site.  
33  
34 Statistical significance was defined as p-value of <0.05.  
35  
36  
37

### 38 *Participant and public involvement* 39

40  
41 Neither participants nor public were directly involved in the development, design or  
42  
43 recruitment of the study.  
44  
45  
46  
47  
48  
49  
50  
51  
52  
53  
54  
55  
56  
57  
58  
59  
60

## Results

### *Participant characteristics*

Of 1858 MSM enrolled in the community-led test and treat cohort, a total of 1610 (86.7%) participants completed both CT and NG testing in all three anatomical sites at baseline based on their self-reported sexually exposed contact routes and were included in the analysis. Compared to MSM who did not complete CT/NG testing in all three anatomical sites, MSM who completed CT/NG testing in all three anatomical sites had higher prevalence of CT/NG infections at any anatomical sites (29.9% vs 16.4%,  $p < 0.001$ ) and reported higher sexual risk behaviors (**Supplementary Files 1**).

At enrollment, the prevalence of CT/NG infections at any anatomical sites was 29.9%: 21.7% for CT infection and 15.5% for NG infection. The most prevalent CT/NG infections by anatomical sites were rectal CT (15.0%), rectal NG (9.3%), and urethral CT (7.0%). HIV-positive participants had significantly higher prevalence of both CT and NG infections in all anatomical sites, except for pharyngeal NG, and were more likely than HIV-negative participants to be enrolled from the Bangkok sites, self-perceived high risk of HIV transmission in the past month, had unprotected sex in the past month, and self-reported or unsure of having STIs in the past month (**Table 1**).

### *The proportion of missed CT/NG diagnoses per individual if single anatomical site screening was performed*

Among participants who tested negative for CT infection at pharyngeal, rectal, or urethral sites, 19.3%, 7.8%, or 15.8% had CT infection in any of the remaining two sites, respectively (**Table 2**). HIV-positive MSM had significantly higher prevalence of CT infection in any of the

1  
2  
3 remaining two sites among those who tested negative for pharyngeal (32.9% vs 16.2%,  $p<0.001$ )  
4 or urethral CT (29.9% vs 12.7%,  $p<0.001$ ) compared to HIV-negative MSM. Among those who  
5 tested negative for NG infection at pharyngeal, rectal, or urethral site, 9.3%, 6.8%, or 12.4% had  
6 NG infection in any of the remaining two sites, respectively (**Table 3**). HIV-positive MSM had  
7 significantly higher prevalence of NG infection in any of the remaining two sites across all  
8 anatomical sites tested negative (23.7% vs 6.0%,  $p<0.001$  among those who tested negative for  
9 pharyngeal NG; 9.6% vs 6.2%,  $p=0.045$  among those who tested negative for rectal NG; and  
10 24.6% vs 9.7%,  $p<0.001$  among those who tested negative for urethral NG).  
11  
12  
13  
14  
15  
16  
17  
18  
19  
20  
21

### 22 *Pattern of anatomical distribution for all CT/NG infections*

23  
24  
25 Of the total 349 CT infections in our study, 8.0% were isolated to pharyngeal site, 54.7%  
26 to rectal site, and 22.4% to urethral site (**Figure 1**). On the basis of our data, 85.9%, 30.6%, and  
27 67.8% of the total CT infections in our study would have been missed if only pharyngeal, rectal,  
28 or urethral screening was performed, respectively. Of the total 249 NG infections, 25.3%, 37.8%,  
29 and 12.5% were isolated to pharyngeal, rectal, and urethral site, respectively (**Figure 2**).  
30 Collectively, 55.7%, 39.6%, and 77.4% of NG infections would have been missed if only  
31 pharyngeal, rectal, or urethral screening was performed, respectively.  
32  
33  
34  
35  
36  
37  
38  
39  
40  
41

### 42 *Pattern of anatomical distribution of CT/NG infections by anatomical site*

43  
44  
45 Rectal site was the most isolated site of CT/NG infection: 191 out of 242 (78.9%) rectal  
46 CT infection and 94 out of 150 rectal NG infection were isolated to rectum (**Figure 1 and 2**).  
47 Importantly, the majority of each anatomical site of CT/NG infection were isolated to their  
48 respective site: 58.3% and 57.3% for pharyngeal CT and NG infection, respectively; and 69.6%  
49 and 55.4% for urethral CT and NG infection, respectively.  
50  
51  
52  
53  
54  
55  
56  
57  
58  
59  
60

## Discussion

We examined the pattern of anatomical sites of CT/NG infections and showed that among MSM who tested negative for CT or NG infection at either pharyngeal, rectal, or urethral site, 8-19% had CT infection and 7-12% had NG infection at the remaining two sites. Of the 349 CT infections, 8.0% were isolated to pharyngeal site, 54.7% to rectal site, and 22.4% to urethral site; and 85.9%, 30.6%, and 67.8% of would have been missed if only pharyngeal, rectal, or urethral screening was performed, respectively. Of the 249 NG infections, 25.3%, 37.8%, and 12.5% were isolated to pharyngeal, rectal, and urethral site, respectively; and 55.7%, 39.6%, and 77.4% of NG infections would have been missed if only pharyngeal, rectal, or urethral screening was performed, respectively. The majority of each anatomical site of CT/NG infection were isolated to their respective site, with rectal site having the highest proportion of isolation: 78.9% of rectal CT and 62.7% of rectal NG infection. These data suggest that screening at all self-report sexually exposed contact routes is highly recommended. However, if this is not feasible, screening at rectal site would provide the highest yield of CT/NG diagnoses.

The overall prevalence CT/NG infections at any anatomical sites in our cohort was comparable to the historical Thai Facility-based Test and Treat cohort which enrolled previously-unknown HIV-status Thai adult MSM and TGW with similar risk behaviors in 2012 (21.4% for CT and 12.4% for NG infection).<sup>20</sup> The prevalence of CT/NG infections per each anatomical site in our study was comparable to one of the largest studies tested for pharyngeal, rectal, and urethral CT/NG infections based on their self-reported exposure conducted in San Francisco between 2010 and 2011. Among 3039 MSM enrolled, the prevalence of pharyngeal, rectal, and urethral CT infections were 2.3%, 11.9, and 4.4%, respectively; and 6.5%, 9.7%, and 5.5% for pharyngeal, rectal, and urethral NG infections, respectively.<sup>21</sup>

1  
2  
3 To the best of our knowledge, our study was among the first to report the proportion of  
4 missed CT/NG diagnoses per individual if single anatomical site screening was performed.  
5  
6  
7  
8 Supposing that one anatomical site screening was performed, 8-19% of MSM who tested  
9  
10 negative for CT infection and 7-12% of those tested negative for NG infection actually had CT  
11 and NG infection at the remaining two anatomical sites, respectively. Importantly, the proportion  
12  
13 of these potential missed CT/NG diagnoses increased to 11-33% for CT and 10-25% for NG  
14  
15 infection among newly-diagnosed HIV-positive MSM. This may be because a higher proportion  
16  
17 of unprotected sex and self-reported STIs in the past 6 months among HIV-positive MSM  
18  
19 compared with HIV-negative MSM. These results point out the importance of CT/NG screening  
20  
21 at all self-report sexually exposed contact routes. However, if resource limit the number of sites  
22  
23 screened, rectal site proves to be the site of choice for screening, with less than 10% showed any  
24  
25 infection in the remaining two anatomical sites if tested negative.  
26  
27  
28  
29  
30

31 A study conducted in San Francisco in 2003, in which NAATs were used to test MSM  
32  
33 for chlamydia and gonorrhoea at all three anatomical sites, was among the first published studies  
34  
35 to show that the majority of CT (53%) and NG (64%) infections were at non-urethral sites, and  
36  
37 would have been missed if only urethral screening was performed.<sup>10</sup> More recent published data  
38  
39 from multisite in US and the Netherlands showed a range of 43-69% of extra-genital CT  
40  
41 infection and 46-76% of extra-genital NG infection would have been missed if only urethral  
42  
43 screening was performed, which were in line to our findings.<sup>21-24</sup> Data from the San Francisco's  
44  
45 STD clinic between 2008 and 2009 showed that if one anatomical site screening was performed,  
46  
47 screening only the pharynx would miss 81% of CT infection and 32% of NG infection; and  
48  
49 screening only the rectum would miss 23% of CT infection and 52% of NG infection.<sup>25</sup>  
50  
51  
52  
53  
54  
55 Regardless of our similar findings that rectal site screening would miss the fewest infections, the  
56  
57  
58  
59  
60

1  
2  
3 high proportion of potential missed diagnoses if a single anatomical site screening was  
4  
5 performed in any of the three sites support the critical need for all-site, at least depending on self-  
6  
7 reported sexually exposed contact routes, among MSM.  
8  
9

10 Although CT/NG infections at each anatomical site possess distinct characteristics, such  
11  
12 as clinical manifestations, different duration of infections, and concerns over drug-resistant  
13  
14 pathogens,<sup>26 27</sup> the most important thing is the ability to detect and treat those infections  
15  
16 regardless of site. Due to their asymptomatic nature, many patients may not be aware of the  
17  
18 importance of the infections and do not seek medical advice.<sup>18</sup> Healthcare provider can take the  
19  
20 lead in encouraging sexually active MSM to screen for CT/NG infections, at least depending on  
21  
22 their self-reported site of exposure, as the first step towards detecting and providing timely  
23  
24 screening and treatment towards preventing transmission in the community.  
25  
26  
27  
28  
29

30 Nonetheless, the cost of the test could be a major obstacle in implementing this  
31  
32 recommendation resource-limited settings. For instance, the current cost of NAAT test for  
33  
34 CT/NG infections in Thailand is approximately \$30 per anatomical site. This is considered  
35  
36 expensive since more than half of our MSM participants have monthly income of less than \$320.  
37  
38 To reduce the cost of test, a strategy to test pooled specimen has been made with promising  
39  
40 results.<sup>28</sup> Effort in lowering the cost of the CT/NG screening test or developing affordable  
41  
42 molecular technologies for CT/NG detection is needed for MSM in resource-limited settings.  
43  
44  
45

46 Certain limitations need to be considered. Firstly, sexual behaviors were assessed using a  
47  
48 self-administered paper questionnaire. While self-administered questionnaires may improve  
49  
50 disclosure of sensitive behaviors, actual risk behaviors may still be underreported. Secondly, risk  
51  
52 behaviors were captured within the past 6 months. Because CT and NG infections have a long  
53  
54 duration of infection, capturing risk behaviors within the past 6 months was beneficial in  
55  
56  
57  
58  
59



1  
2  
3 assessing risk behaviors since the potential contact date of the infections. However, the relatively  
4 long recall period may lead to recall bias. Thirdly, because CT/NG screening in our study were  
5 based on self-reported sexually exposed contact routes rather than universal screening at all sites,  
6 we were unable to compare the performance between a history-based and universal approach.  
7  
8 Furthermore, by limiting our analysis to MSM who self-reported sexual contact in all three  
9 anatomical sites, the findings may be biased towards those with higher risks which may have led to  
10 an over-estimation of prevalence of CT/NG infections in our sample. Finally, we may have  
11 missed extra-genitalia samples from a modest number of participants (248 MSM [13.4% of total  
12 MSM enrolled]) due to social desirability bias regarding questions about the site(s) of sexual  
13 contact.  
14  
15  
16  
17  
18  
19  
20  
21  
22  
23  
24  
25  
26

27 Our study found a high proportion of CT/NG infections would have been missed among  
28 MSM if single anatomical site screening is performed, especially among HIV-positive MSM. We  
29 recommend that all-site screening should be performed among MSM, at least based on self-  
30 reported sexually exposed contact routes. However, if this is not feasible, rectal screening  
31 provides the highest yield of CT/NG diagnoses. Effort in lowering the cost of the CT/NG  
32 screening test or developing affordable molecular technologies for CT/NG detection is needed  
33 for MSM in resource-limited settings.  
34  
35  
36  
37  
38  
39  
40  
41  
42  
43  
44  
45  
46  
47  
48  
49  
50  
51  
52  
53  
54  
55  
56  
57  
58  
59  
60

## Acknowledgements

We would like to express our sincere thanks to all participants and study staff. This work was made possible by the United States Agency for International Development (USAID) and the United States President's Emergency Plan for AIDS Relief (PEPFAR). The contents are the responsibility of the LINKAGES project and do not necessarily reflect the views of USAID, PEPFAR, or the United States Government.

## Conflict of interest

The authors declared no conflict of interest relevant to this work.

## Authors' contributions

AH interpreted the data, drafted the manuscript, and performed statistical analysis. TS and JJ coordinated the study and oversaw data management. DT gave advised on statistical analysis and performed statistical analysis. TS, JJ, SM, RV, and NP designed and conducted the study. NP advised on the analysis plan. NP and PP led the study. All authors critically reviewed and approved the final draft of manuscript.

## Data sharing statement

Data are available. Please contact corresponding author.

## Funding statement

Funding for this projected was supported through LINKAGES, a five-year cooperative agreement (AID-OAA-A-14-00045), which is led by FHI 360 in partnership with IntraHealth International, Pact, and the University of North Carolina at Chapel Hill.

## References

1. Centers for Disease Control and Prevention. Sexually Trasmitted Disease Surveillance 2017  
2018.
2. Tongtoyai J, Todd CS, Chonwattana W, et al. Prevalence and Correlates of Chlamydia  
trachomatis and Neisseria gonorrhoeae by Anatomic Site Among Urban Thai Men Who  
Have Sex With Men. Sexually transmitted diseases 2015;**42**(8):440-9.
3. Jatapai A, Sirivongrangson P, Lokpichat S, et al. Prevalence and risk factors for Chlamydia  
trachomatis infection among young Thai men in 2008-2009. Sexually transmitted  
diseases 2013;**40**(3):241-6.
4. Fleming DT, Wasserheit JN. From epidemiological synergy to public health policy and  
practice: the contribution of other sexually transmitted diseases to sexual transmission of  
HIV infection. Sexually transmitted infections 1999;**75**(1):3-17.
5. Bernstein KT, Marcus JL, Nieri G, et al. Rectal gonorrhea and chlamydia reinfection is  
associated with increased risk of HIV seroconversion. Journal of acquired immune  
deficiency syndromes 2010;**53**(4):537-43.
6. Katz DA, Dombrowski JC, Bell TR, et al. HIV Incidence Among Men Who Have Sex With  
Men After Diagnosis With Sexually Transmitted Infections. Sexually transmitted  
diseases 2016;**43**(4):249-54.
7. Lutz AR. Screening for Asymptomatic Extragenital Gonorrhea and Chlamydia in Men Who  
Have Sex with Men: Significance, Recommendations, and Options for Overcoming  
Barriers to Testing. LGBT health 2015;**2**(1):27-34.
8. Morris SR, Klausner JD, Buchbinder SP, et al. Prevalence and incidence of pharyngeal  
gonorrhea in a longitudinal sample of men who have sex with men: the EXPLORE study.

- 1  
2  
3 Clinical infectious diseases : an official publication of the Infectious Diseases Society of  
4  
5 America 2006;**43**(10):1284-9.  
6  
7
- 8 9. Weinstock H, Workowski KA. Pharyngeal Gonorrhea: An Important Reservoir of Infection?  
9  
10 Clinical Infectious Diseases 2009;**49**(12):1798-800.  
11
- 12 10. Kent CK, Chaw JK, Wong W, et al. Prevalence of rectal, urethral, and pharyngeal chlamydia  
13  
14 and gonorrhea detected in 2 clinical settings among men who have sex with men: San  
15  
16 Francisco, California, 2003. Clinical infectious diseases : an official publication of the  
17  
18 Infectious Diseases Society of America 2005;**41**(1):67-74.  
19
- 20 21 11. Bachmann LH, Johnson RE, Cheng H, et al. Nucleic Acid Amplification Tests for Diagnosis  
22  
23 of Neisseria gonorrhoeae and Chlamydia trachomatis Rectal Infections. Journal of  
24  
25 clinical microbiology 2010;**48**(5):1827-32.  
26  
27
- 28 29 12. Bachmann LH, Johnson RE, Cheng H, et al. Nucleic acid amplification tests for diagnosis of  
30  
31 Neisseria gonorrhoeae oropharyngeal infections. Journal of clinical microbiology  
32  
33 2009;**47**(4):902-7.  
34
- 35 36 13. Mimiaga MJ, Mayer KH, Reisner SL, et al. Asymptomatic gonorrhea and chlamydial  
37  
38 infections detected by nucleic acid amplification tests among Boston area men who have  
39  
40 sex with men. Sexually transmitted diseases 2008;**35**(5):495-8.  
41
- 42 43 14. Schachter J, Moncada J, Liska S, et al. Nucleic acid amplification tests in the diagnosis of  
44  
45 chlamydial and gonococcal infections of the oropharynx and rectum in men who have sex  
46  
47 with men. Sexually transmitted diseases 2008;**35**(7):637-42.  
48
- 49 50 15. Workowski KA, Bolan GA. Sexually transmitted diseases treatment guidelines, 2015.  
51  
52 MMWR Recomm Rep 2015;**64**(Rr-03):1-137.  
53  
54  
55  
56  
57  
58  
59  
60

- 1  
2  
3 16. Ooi C, Lewis D. Updating the management of sexually transmitted infections. *Australian*  
4  
5 *Prescriber* 2015;**38**(6):204-08.  
6
- 7  
8 17. Barbee LA, Dhanireddy S, Tat SA, et al. Barriers to Bacterial STI Testing of HIV-Infected  
9  
10 *Men who have Sex with Men Engaged in HIV Primary Care. Sexually transmitted*  
11  
12 *diseases* 2015;**42**(10):590-94.  
13
- 14  
15 18. Denison HJ, Bromhead C, Grainger R, et al. Barriers to sexually transmitted infection testing  
16  
17 *in New Zealand: a qualitative study. Australian and New Zealand journal of public health*  
18  
19 *2017;41*(4):432-37.  
20
- 21  
22 19. Seekaew P, Pengnonyang S, Jantarapakde J, et al. Characteristics and HIV epidemiologic  
23  
24 *profiles of men who have sex with men and transgender women in key population-led*  
25  
26 *test and treat cohorts in Thailand. PloS one* 2018;**13**(8):e0203294.  
27
- 28  
29 20. Hiransuthikul A, Pattanachaiwit S, Teeratakulpisarn N, et al. High subsequent and recurrent  
30  
31 *sexually transmitted infection prevalence among newly diagnosed HIV-positive Thai*  
32  
33 *men who have sex with men and transgender women in the Test and Treat cohort.*  
34  
35 *International journal of STD & AIDS* 2018:956462418799213.  
36
- 37  
38 21. Barbee LA, Dombrowski JC, Kerani R, et al. Effect of nucleic acid amplification testing on  
39  
40 *detection of extragenital gonorrhea and chlamydial infections in men who have sex with*  
41  
42 *men sexually transmitted disease clinic patients. Sexually transmitted diseases*  
43  
44 *2014;41*(3):168-72.  
45
- 46  
47 22. Gunn RA, O'Brien CJ, Lee MA, et al. Gonorrhea screening among men who have sex with  
48  
49 *men: value of multiple anatomic site testing, San Diego, California, 1997-2003. Sexually*  
50  
51 *transmitted diseases* 2008;**35**(10):845-8.  
52  
53  
54  
55  
56  
57  
58  
59

- 1  
2  
3 23. Koedijk FD, van Bergen JE, Dukers-Muijrs NH, et al. The value of testing multiple  
4  
5 anatomic sites for gonorrhoea and chlamydia in sexually transmitted infection centres in  
6  
7 the Netherlands, 2006-2010. *International journal of STD & AIDS* 2012;**23**(9):626-31.  
8  
9
- 10 24. van Liere GA, Hoebe CJ, Dukers-Muijrs NH. Evaluation of the anatomical site distribution  
11  
12 of chlamydia and gonorrhoea in men who have sex with men and in high-risk women by  
13  
14 routine testing: cross-sectional study revealing missed opportunities for treatment  
15  
16 strategies. *Sexually transmitted infections* 2014;**90**(1):58-60.  
17  
18
- 19 25. Marcus JL, Bernstein KT, Kohn RP, et al. Infections missed by urethral-only screening for  
20  
21 chlamydia or gonorrhea detection among men who have sex with men. *Sexually*  
22  
23 *transmitted diseases* 2011;**38**(10):922-4.  
24  
25
- 26 26. Chow EP, Camilleri S, Ward C, et al. Duration of gonorrhoea and chlamydia infection at the  
27  
28 pharynx and rectum among men who have sex with men: a systematic review. *Sexual*  
29  
30 *health* 2016;**13**(3):199-204.  
31  
32
- 33 27. Wi T, Lahra MM, Ndowa F, et al. Antimicrobial resistance in *Neisseria gonorrhoeae*: Global  
34  
35 surveillance and a call for international collaborative action. *PLoS medicine*  
36  
37 2017;**14**(7):e1002344.  
38  
39
- 40 28. Speers DJ, Chua IJ, Manuel J, et al. Detection of *Neisseria gonorrhoeae* and *Chlamydia*  
41  
42 *trachomatis* from pooled rectal, pharyngeal and urine specimens in men who have sex  
43  
44 with men. *Sexually transmitted infections* 2018;**94**(4):293-97.  
45  
46  
47  
48  
49  
50  
51  
52  
53  
54  
55  
56  
57  
58  
59  
60

**Table 1.** Demographic of 1610 men who have sex with men included in the analysis

| Characteristics                                       | Overall<br>(n=1610) |      | HIV-positive<br>(n=303) |      | HIV-negative<br>(n=1307) |      | p-value |
|-------------------------------------------------------|---------------------|------|-------------------------|------|--------------------------|------|---------|
|                                                       | n                   | %    | n                       | %    | n                        | %    |         |
| <b>Median age (IQR) years</b>                         | 24.1<br>(20.8-30.0) |      | 24.1<br>(21.0-28.7)     |      | 24.1<br>(20.8-30.5)      |      | 0.48    |
| <b>Site</b>                                           |                     |      |                         |      |                          |      | <0.001  |
| Bangkok                                               | 676                 | 42.0 | 164                     | 54.1 | 512                      | 39.2 |         |
| Chiang Mai                                            | 541                 | 33.6 | 61                      | 20.1 | 480                      | 36.7 |         |
| Hat Yai                                               | 152                 | 9.4  | 17                      | 5.6  | 135                      | 10.3 |         |
| Pattaya city                                          | 241                 | 15.0 | 61                      | 20.1 | 180                      | 13.8 |         |
| <b>Marital status</b>                                 |                     |      |                         |      |                          |      | 0.19    |
| Single                                                | 1158/1598           | 72.5 | 218/301                 | 72.4 | 940/1297                 | 72.5 |         |
| Living together with male partner                     | 381/1598            | 23.8 | 77/301                  | 25.6 | 304/1297                 | 23.4 |         |
| Married to a woman                                    | 59/1598             | 3.7  | 6/301                   | 2.0  | 53/1297                  | 4.1  |         |
| <b>Highest education</b>                              |                     |      |                         |      |                          |      | 0.46    |
| Lower than high school                                | 325/1594            | 20.4 | 68/299                  | 22.7 | 257/1295                 | 19.9 |         |
| High school                                           | 638/1594            | 40.0 | 120/299                 | 40.1 | 518/1295                 | 40.0 |         |
| Higher than high school                               | 631/1594            | 39.6 | 111/299                 | 27.1 | 520/1295                 | 40.2 |         |
| <b>Main occupation</b>                                |                     |      |                         |      |                          |      | 0.06    |
| Unemployed                                            | 97/1598             | 6.1  | 25/300                  | 8.3  | 72/1298                  | 5.6  |         |
| Student                                               | 486/1598            | 30.4 | 76/300                  | 25.3 | 410/1298                 | 31.6 |         |
| Sex worker                                            | 707/1598            | 44.2 | 133/300                 | 44.3 | 574/1298                 | 44.2 |         |
| Employed, other than sex worker                       | 308/1598            | 19.3 | 66/300                  | 22.0 | 242/1298                 | 18.6 |         |
| <b>Income &gt;10,000 THB (\$320) per month</b>        | 672/1383            | 48.6 | 124/264                 | 47.0 | 548/1119                 | 49.0 | 0.56    |
| <b>Median age (IQR) of first sexual intercourse</b>   | 17<br>(15-19)       |      | 17<br>(15-19)           |      | 17<br>(15-19)            |      | 0.22    |
| <b>Male circumcision</b>                              | 186/1391            | 13.4 | 25/240                  | 10.4 | 161/1151                 | 14.0 | 0.14    |
| <b>Number of sexual partners in the past 6 months</b> |                     |      |                         |      |                          |      | 0.34    |
| No sexual partner                                     | 30/1603             | 1.9  | 7/300                   | 2.3  | 23/1303                  | 1.8  |         |
| Single partner                                        | 308/1603            | 19.2 | 59/300                  | 19.7 | 249/1303                 | 19.1 |         |
| Multiple partners                                     | 870/1603            | 54.3 | 150/300                 | 50.0 | 720/1303                 | 55.3 |         |
| Refuse to answer                                      | 395/1603            | 24.6 | 84/300                  | 28.0 | 311/1303                 | 23.9 |         |
| <b>Unprotected sex in the past 6 months</b>           | 1261/1586           | 79.5 | 252/298                 | 84.6 | 1009/1288                | 78.3 | 0.02    |
| <b>Illicit drug used in the past 6 months</b>         | 599/1530            | 39.2 | 100/278                 | 36.0 | 499/1252                 | 39.9 | 0.23    |
| <b>Self-reported STIs in the past 6 months</b>        |                     |      |                         |      |                          |      | <0.001  |
| No                                                    | 977/1546            | 63.2 | 146/291                 | 50.2 | 831/1255                 | 66.2 |         |
| Yes                                                   | 106/1546            | 6.9  | 21/291                  | 7.2  | 85/1255                  | 6.8  |         |
| Not sure                                              | 463/1546            | 29.9 | 124/291                 | 42.6 | 339/1255                 | 27.0 |         |
| <b>Group sex in the past 6 months</b>                 | 207/1520            | 13.6 | 47/286                  | 16.4 | 160/1234                 | 13.0 | 0.12    |
| <b>Overall CT infections</b>                          | 349                 | 21.7 | 111                     | 36.6 | 238                      | 18.2 | <0.001  |
| Pharyngeal CT                                         | 48                  | 3.0  | 17                      | 5.6  | 31                       | 2.4  | 0.003   |
| Rectal CT                                             | 242                 | 15.0 | 88                      | 29.0 | 154                      | 11.8 | <0.001  |
| Urethral CT                                           | 112                 | 7.0  | 29                      | 9.6  | 83                       | 6.4  | 0.04    |
| <b>Overall NG infections</b>                          | 249                 | 15.5 | 91                      | 30.0 | 158                      | 12.1 | <0.001  |
| Pharyngeal NG                                         | 110                 | 6.8  | 25                      | 8.3  | 85                       | 6.5  | 0.28    |
| Rectal NG                                             | 150                 | 9.3  | 68                      | 22.4 | 82                       | 6.3  | <0.001  |
| Urethral NG                                           | 56                  | 3.5  | 22                      | 7.3  | 34                       | 2.6  | <0.001  |

Abbreviations: CT, *Chlamydia trachomatis*; NG, *Neisseria gonorrhoeae*; STIs, Sexually transmitted infections

**Table 2.** Prevalence of *Chlamydia trachomatis* infections at the remaining two sites among men who have sex with men who had negative result at pharyngeal, rectal, and urethral site, respectively.

| Negative site       | Positive site                  | Prevalence (95%CI) |                  |                  | p-value |
|---------------------|--------------------------------|--------------------|------------------|------------------|---------|
|                     |                                | Overall            | HIV-positive     | HIV-negative     |         |
| Pharyngeal (n=1562) | Rectal (n=223)                 | 14.3 (12.6-16.1)   | 27.6 (22.5-33.2) | 11.3 (9.6-13.2)  | <0.001  |
|                     | Urethral (n=110)               | 7.0 (5.8-8.4)      | 10.1 (6.9-14.2)  | 6.4 (5.1-7.8)    | 0.02    |
|                     | Rectal or urethral (n=301)     | 19.3 (17.3-21.3)   | 32.9 (27.5-38.6) | 16.2 (14.2-18.4) | <0.001  |
| Rectal (n=1368)     | Pharyngeal (n=29)              | 2.1 (1.4-3.0)      | 3.7 (1.6-7.2)    | 1.8 (1.1-2.8)    | 0.08    |
|                     | Urethral (n=79)                | 5.8 (4.6-7.2)      | 7.0 (4.0-11.2)   | 5.6 (4.3-7.0)    | 0.41    |
|                     | Pharyngeal or urethral (n=107) | 7.8 (6.5-9.4)      | 10.7 (6.9-15.6)  | 7.3 (5.9-8.9)    | 0.09    |
| Urethral (n=1498)   | Pharyngeal (n=46)              | 3.1 (2.3-4.1)      | 6.2 (3.7-9.7)    | 2.4 (1.6-3.4)    | 0.001   |
|                     | Rectal (n=209)                 | 14.0 (12.2-15.8)   | 27.0 (21.8-32.7) | 11.0 (9.3-12.9)  | <0.001  |
|                     | Pharyngeal or rectal (n=237)   | 15.8 (14.0-17.8)   | 29.9 (24.6-35.7) | 12.7 (10.9-14.7) | <0.001  |

**Table 3.** Prevalence of *Neisseria gonorrhoeae* infections at the remaining two sites among men who have sex with men who had negative result at pharyngeal, rectal, and urethral site, respectively.

| Negative site       | Positive site                 | Prevalence (95%CI) |                  |                | p-value |
|---------------------|-------------------------------|--------------------|------------------|----------------|---------|
|                     |                               | Overall            | HIV-positive     | HIV-negative   |         |
| Pharyngeal (n=1500) | Rectal (n=108)                | 7.2 (5.9-8.6)      | 20.5 (15.9-25.7) | 4.2 (3.1-5.5)  | <0.001  |
|                     | Urethral (n=45)               | 3.0 (2.2-4.0)      | 6.1 (3.6-9.6)    | 2.3 (1.5-3.3)  | 0.001   |
|                     | Rectal or urethral (n=139)    | 9.3 (7.8-10.8)     | 23.7 (18.9-29.2) | 6.0 (4.7-7.5)  | <0.001  |
| Rectal (n=1460)     | Pharyngeal (n=68)             | 4.7 (3.6-5.9)      | 6.0 (3.3-9.8)    | 4.4 (3.3-5.7)  | 0.30    |
|                     | Urethral (n=36)               | 2.5 (1.7-3.4)      | 4.3 (2.1-7.7)    | 2.1 (1.4-3.1)  | 0.05    |
|                     | Pharyngeal or urethral (n=99) | 6.8 (5.5-8.2)      | 9.8 (6.3-14.3)   | 6.2 (4.9-7.7)  | 0.045   |
| Urethral (n=1554)   | Pharyngeal (n=99)             | 6.4 (5.2-7.7)      | 7.1 (4.4-10.8)   | 6.2 (4.9-7.7)  | 0.57    |
|                     | Rectal (n=130)                | 8.4 (7.0-9.9)      | 19.9 (15.4-25.1) | 5.8 (4.6-7.2)  | <0.001  |
|                     | Pharyngeal or rectal (n=193)  | 12.4 (10.8-14.2)   | 24.6 (19.6-30.0) | 9.7 (8.2-11.5) | <0.001  |



1  
2  
3 **FIGURE LEGENDS**  
4

5  
6 **Figure 1.** Distribution of CT infections (n=349) by anatomical site.  
7

8  
9  
10 **Figure 2.** Distribution of NG infections (n=249) by anatomical site.  
11  
12  
13  
14  
15  
16  
17  
18  
19  
20  
21  
22  
23  
24  
25  
26  
27  
28  
29  
30  
31  
32  
33  
34  
35  
36  
37  
38  
39  
40  
41  
42  
43  
44  
45  
46  
47  
48  
49  
50  
51  
52  
53  
54  
55  
56  
57  
58  
59  
60

For peer review only

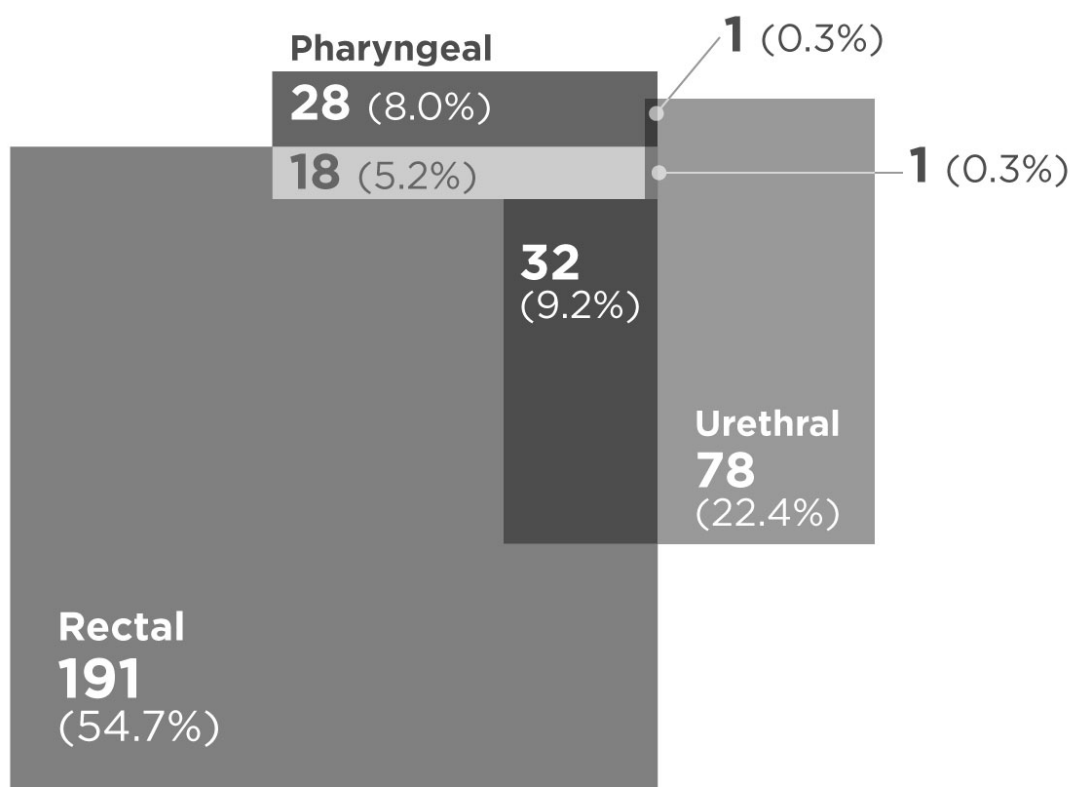

| Type(s) of infection    | No. of participants (%) with CT infections |                     |                       |
|-------------------------|--------------------------------------------|---------------------|-----------------------|
|                         | Pharyngeal<br>(n = 48)                     | Rectal<br>(n = 242) | Urethral<br>(n = 112) |
| <b>Isolated site</b>    | 28 (58.3)                                  | 191 (78.9)          | 78 (69.6)             |
| <b>Multiple sites</b>   |                                            |                     |                       |
| Pharyngeal and rectal   | 18 (37.5)                                  | 18 (7.4)            | -                     |
| Pharyngeal and urethral | 1 (2.1)                                    | -                   | 1 (0.9)               |
| Rectal and urethral     | -                                          | 32 (13.2)           | 32 (28.6)             |
| All 3 sites             | 1 (2.3)                                    | 1 (0.4)             | 1 (0.9)               |

Abbreviations: CT, *Chlamydia trachomatis*

**Figure 1.** Distribution of CT infections (n=349) by anatomical site.

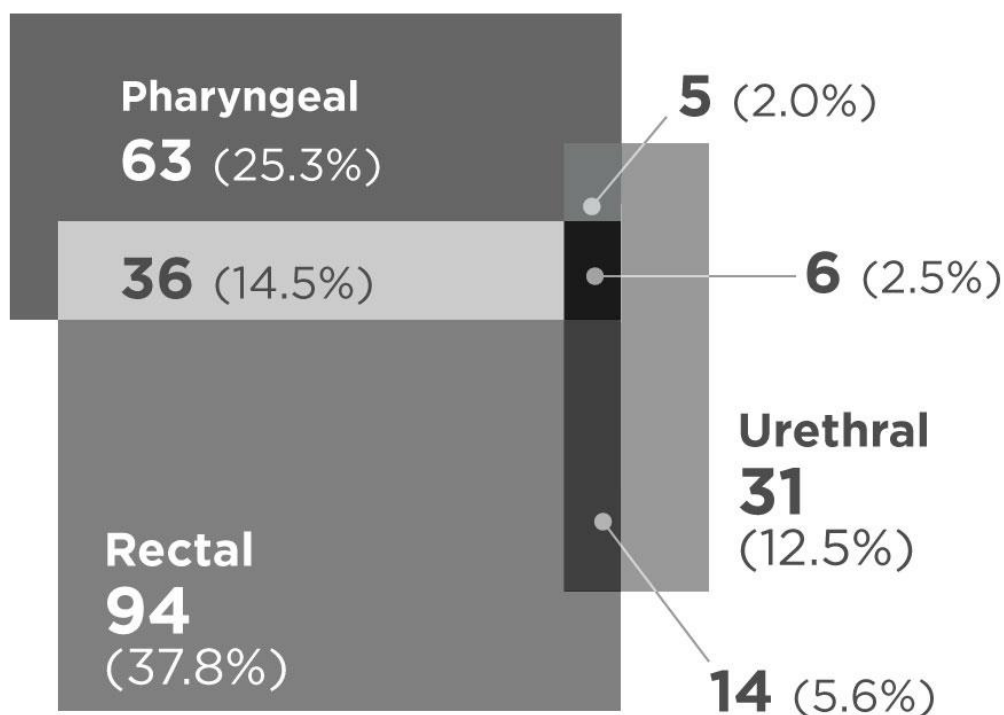

| Type(s) of infection    | No. of participants (%) with NG infections |                     |                      |
|-------------------------|--------------------------------------------|---------------------|----------------------|
|                         | Pharyngeal<br>(n = 110)                    | Rectal<br>(n = 150) | Urethral<br>(n = 56) |
| <b>Isolated site</b>    | 63 (57.3)                                  | 94 (62.7)           | 31 (55.4)            |
| <b>Multiple sites</b>   |                                            |                     |                      |
| Pharyngeal and rectal   | 36 (32.7)                                  | 36 (24.0)           | -                    |
| Pharyngeal and urethral | 5 (4.6)                                    | -                   | 5 (8.9)              |
| Rectal and urethral     | -                                          | 14 (9.3)            | 14 (25.0)            |
| All 3 sites             | 6 (5.7)                                    | 6 (4.2)             | 6 (11.5)             |

Abbreviations: NG, *Neisseria gonorrhoeae*

**Figure 2.** Distribution of NG infections (n=249) by anatomical site.

**Supplementary File 1.** Demographic of all men who have sex with men enrolled in the community-based test and treat cohort

| Characteristics                                       | Overall (n=1858)    |      | MSM who were included in the analysis (completed 3 sites CT/NG screening) (n=1610) |      | MSM who were excluded from the analysis (did not complete 3 sites CT/NG screening) (n=248) |      | p-value |
|-------------------------------------------------------|---------------------|------|------------------------------------------------------------------------------------|------|--------------------------------------------------------------------------------------------|------|---------|
|                                                       | n                   | %    | n                                                                                  | %    | n                                                                                          | %    |         |
| <b>Median age (IQR) years</b>                         | 24.2<br>(20.9-30.2) |      | 24.1<br>(20.8-30.0)                                                                |      | 24.4<br>(21.4-31.9)                                                                        |      | 0.09    |
| <b>Site</b>                                           |                     |      |                                                                                    |      |                                                                                            |      | <0.001  |
| Bangkok                                               | 824                 | 44.4 | 676                                                                                | 42.0 | 148                                                                                        | 59.7 |         |
| Chiang Mai                                            | 564                 | 30.4 | 541                                                                                | 33.6 | 23                                                                                         | 9.3  |         |
| Hat Yai                                               | 216                 | 11.6 | 152                                                                                | 9.4  | 64                                                                                         | 25.8 |         |
| Pattaya city                                          | 254                 | 13.7 | 241                                                                                | 15.0 | 13                                                                                         | 5.2  |         |
| <b>Marital status</b>                                 |                     |      |                                                                                    |      |                                                                                            |      | <0.001  |
| Single                                                | 1319/1845           | 71.5 | 1158/1598                                                                          | 72.5 | 161/247                                                                                    | 65.2 |         |
| Living together with male partner                     | 434/1845            | 23.5 | 381/1598                                                                           | 23.8 | 53/247                                                                                     | 21.5 |         |
| Married to a woman                                    | 92/1845             | 5.0  | 59/1598                                                                            | 3.7  | 33/247                                                                                     | 13.4 |         |
| <b>Highest education</b>                              |                     |      |                                                                                    |      |                                                                                            |      | 0.003   |
| Lower than high school                                | 392/1838            | 21.3 | 325/1594                                                                           | 20.4 | 67/244                                                                                     | 27.5 |         |
| High school                                           | 710/1838            | 38.6 | 638/1594                                                                           | 40.0 | 72/244                                                                                     | 29.5 |         |
| Higher than high school                               | 736/1838            | 40.1 | 631/1594                                                                           | 39.6 | 105/244                                                                                    | 43.0 |         |
| <b>Main occupation</b>                                |                     |      |                                                                                    |      |                                                                                            |      | 0.13    |
| Unemployed                                            | 116/1843            | 6.3  | 97/1598                                                                            | 6.1  | 19/245                                                                                     | 7.8  |         |
| Student                                               | 547/1843            | 29.7 | 486/1598                                                                           | 30.4 | 61/245                                                                                     | 24.9 |         |
| Sex worker                                            | 367/1843            | 19.9 | 707/1598                                                                           | 44.2 | 106/245                                                                                    | 43.3 |         |
| Employed, other than sex worker                       | 813/1843            | 44.1 | 308/1598                                                                           | 19.3 | 59/245                                                                                     | 24.1 |         |
| <b>Income &gt;10,000 THB (\$320) per month</b>        | 792/1594            | 49.7 | 672/1383                                                                           | 48.6 | 120/211                                                                                    | 56.9 | 0.03    |
| <b>Median age (IQR) of first sexual intercourse</b>   | 17<br>(15-19)       |      | 17<br>(15-19)                                                                      |      | 17<br>(15-19)                                                                              |      | 0.46    |
| <b>Male circumcision</b>                              | 213/1603            | 13.3 | 186/1391                                                                           | 13.4 | 27/212                                                                                     | 12.7 | 0.80    |
| <b>Number of sexual partners in the past 6 months</b> |                     |      |                                                                                    |      |                                                                                            |      | 0.27    |
| No sexual partner                                     | 39/1851             | 2.1  | 30/1603                                                                            | 1.9  | 9                                                                                          | 3.6  |         |
| Single partner                                        | 353/1851            | 19.1 | 308/1603                                                                           | 19.2 | 45                                                                                         | 18.2 |         |
| Multiple partners                                     | 1009/1851           | 54.5 | 870/1603                                                                           | 54.3 | 139                                                                                        | 56.1 |         |
| Refuse to answer                                      | 450/1851            | 24.3 | 395/1603                                                                           | 24.6 | 55                                                                                         | 22.2 |         |
| <b>Unprotected sex in the past 6 months</b>           | 1432/1831           | 78.2 | 1261/1586                                                                          | 79.5 | 171/245                                                                                    | 69.8 | 0.001   |
| <b>Illicit drug used in the past 6 months</b>         | 685/1765            | 38.8 | 599/1530                                                                           | 39.2 | 86/235                                                                                     | 36.6 | 0.45    |
| <b>Self-reported STIs in the past 6 months</b>        |                     |      |                                                                                    |      |                                                                                            |      | 0.007   |
| No                                                    | 1157/1788           | 64.7 | 977/1546                                                                           | 63.2 | 180/242                                                                                    | 74.4 |         |
| Yes                                                   | 119/1788            | 6.7  | 106/1546                                                                           | 6.9  | 13/242                                                                                     | 5.4  |         |
| Not sure                                              | 512/1788            | 28.6 | 463/1546                                                                           | 29.9 | 49/242                                                                                     | 20.2 |         |
| <b>Group sex in the past 6 months</b>                 | 217/1747            | 12.4 | 207/1520                                                                           | 13.6 | 10/227                                                                                     | 4.4  | <0.001  |
| <b>Overall CT infections</b>                          | 379/1842            | 20.6 | 349                                                                                | 21.7 | 30/232                                                                                     | 12.9 | 0.002   |
| Pharyngeal CT                                         | 54/1840             | 2.9  | 48                                                                                 | 3.0  | 6/230                                                                                      | 2.6  | 0.75    |
| Rectal CT                                             | 245/1617            | 15.2 | 242                                                                                | 15.0 | 3/7                                                                                        | 42.9 | 0.04    |
| Urethral CT                                           | 133/1833            | 7.3  | 112                                                                                | 7.0  | 21/223                                                                                     | 9.4  | 0.18    |
| <b>Overall NG infections</b>                          | 267/1842            | 14.5 | 249                                                                                | 15.5 | 18/232                                                                                     | 7.8  | 0.002   |
| Pharyngeal NG                                         | 120/1840            | 6.5  | 110                                                                                | 6.8  | 10/230                                                                                     | 4.4  | 0.15    |
| Rectal NG                                             | 151/1617            | 9.3  | 150                                                                                | 9.3  | 1/7                                                                                        | 14.3 | 0.65    |
| Urethral NG                                           | 64/1833             | 3.5  | 56                                                                                 | 3.5  | 8/223                                                                                      | 3.6  | 0.93    |

Abbreviations: CT, *Chlamydia trachomatis*; NG, *Neisseria gonorrhoeae*; STIs, sexually transmitted infections

STROBE Statement—Checklist of items that should be included in reports of *cohort studies*

|                              | Item No | Recommendation                                                                                                                                                                                                                                                                                                         | Page No |
|------------------------------|---------|------------------------------------------------------------------------------------------------------------------------------------------------------------------------------------------------------------------------------------------------------------------------------------------------------------------------|---------|
| <b>Title and abstract</b>    | 1       | (a) Indicate the study's design with a commonly used term in the title or the abstract<br>(b) Provide in the abstract an informative and balanced summary of what was done and what was found                                                                                                                          | 1       |
| <b>Introduction</b>          |         |                                                                                                                                                                                                                                                                                                                        |         |
| Background/rationale         | 2       | Explain the scientific background and rationale for the investigation being reported                                                                                                                                                                                                                                   | 4       |
| Objectives                   | 3       | State specific objectives, including any prespecified hypotheses                                                                                                                                                                                                                                                       | 5       |
| <b>Methods</b>               |         |                                                                                                                                                                                                                                                                                                                        |         |
| Study design                 | 4       | Present key elements of study design early in the paper                                                                                                                                                                                                                                                                | 6       |
| Setting                      | 5       | Describe the setting, locations, and relevant dates, including periods of recruitment, exposure, follow-up, and data collection                                                                                                                                                                                        | 6       |
| Participants                 | 6       | (a) Give the eligibility criteria, and the sources and methods of selection of participants. Describe methods of follow-up<br>(b) For matched studies, give matching criteria and number of exposed and unexposed                                                                                                      | 6       |
| Variables                    | 7       | Clearly define all outcomes, exposures, predictors, potential confounders, and effect modifiers. Give diagnostic criteria, if applicable                                                                                                                                                                               | 7       |
| Data sources/<br>measurement | 8*      | For each variable of interest, give sources of data and details of methods of assessment (measurement). Describe comparability of assessment methods if there is more than one group                                                                                                                                   | 7       |
| Bias                         | 9       | Describe any efforts to address potential sources of bias                                                                                                                                                                                                                                                              | -       |
| Study size                   | 10      | Explain how the study size was arrived at                                                                                                                                                                                                                                                                              | -       |
| Quantitative variables       | 11      | Explain how quantitative variables were handled in the analyses. If applicable, describe which groupings were chosen and why                                                                                                                                                                                           | 7       |
| Statistical methods          | 12      | (a) Describe all statistical methods, including those used to control for confounding<br>(b) Describe any methods used to examine subgroups and interactions<br>(c) Explain how missing data were addressed<br>(d) If applicable, explain how loss to follow-up was addressed<br>(e) Describe any sensitivity analyses | 7       |
| <b>Results</b>               |         |                                                                                                                                                                                                                                                                                                                        |         |
| Participants                 | 13*     | (a) Report numbers of individuals at each stage of study—eg numbers potentially eligible, examined for eligibility, confirmed eligible, included in the study, completing follow-up, and analysed<br>(b) Give reasons for non-participation at each stage<br>(c) Consider use of a flow diagram                        | 7       |
| Descriptive data             | 14*     | (a) Give characteristics of study participants (eg demographic, clinical, social) and information on exposures and potential confounders<br>(b) Indicate number of participants with missing data for each variable of interest<br>(c) Summarise follow-up time (eg, average and total amount)                         | 7       |
| Outcome data                 | 15*     | Report numbers of outcome events or summary measures over time                                                                                                                                                                                                                                                         | 8       |

|    |                          |    |                                                                                                                                                                                                              |    |
|----|--------------------------|----|--------------------------------------------------------------------------------------------------------------------------------------------------------------------------------------------------------------|----|
| 1  | Main results             | 16 | (a) Give unadjusted estimates and, if applicable, confounder-adjusted estimates and their precision (eg, 95% confidence interval). Make clear which confounders were adjusted for and why they were included | 8  |
| 2  |                          |    | (b) Report category boundaries when continuous variables were categorized                                                                                                                                    |    |
| 3  |                          |    | (c) If relevant, consider translating estimates of relative risk into absolute risk for a meaningful time period                                                                                             |    |
| 4  |                          |    |                                                                                                                                                                                                              |    |
| 5  |                          |    |                                                                                                                                                                                                              |    |
| 6  |                          |    |                                                                                                                                                                                                              |    |
| 7  |                          |    |                                                                                                                                                                                                              |    |
| 8  |                          |    |                                                                                                                                                                                                              |    |
| 9  | Other analyses           | 17 | Report other analyses done—eg analyses of subgroups and interactions, and sensitivity analyses                                                                                                               | -  |
| 10 |                          |    |                                                                                                                                                                                                              |    |
| 11 | <b>Discussion</b>        |    |                                                                                                                                                                                                              |    |
| 12 |                          |    |                                                                                                                                                                                                              |    |
| 13 | Key results              | 18 | Summarise key results with reference to study objectives                                                                                                                                                     | 10 |
| 14 | Limitations              | 19 | Discuss limitations of the study, taking into account sources of potential bias or imprecision. Discuss both direction and magnitude of any potential bias                                                   | 12 |
| 15 |                          |    |                                                                                                                                                                                                              |    |
| 16 | Interpretation           | 20 | Give a cautious overall interpretation of results considering objectives, limitations, multiplicity of analyses, results from similar studies, and other relevant evidence                                   | 10 |
| 17 |                          |    |                                                                                                                                                                                                              |    |
| 18 |                          |    |                                                                                                                                                                                                              |    |
| 19 | Generalisability         | 21 | Discuss the generalisability (external validity) of the study results                                                                                                                                        | 12 |
| 20 |                          |    |                                                                                                                                                                                                              |    |
| 21 | <b>Other information</b> |    |                                                                                                                                                                                                              |    |
| 22 | Funding                  | 22 | Give the source of funding and the role of the funders for the present study and, if applicable, for the original study on which the present article is based                                                | 14 |
| 23 |                          |    |                                                                                                                                                                                                              |    |
| 24 |                          |    |                                                                                                                                                                                                              |    |

\*Give information separately for exposed and unexposed groups.

**Note:** An Explanation and Elaboration article discusses each checklist item and gives methodological background and published examples of transparent reporting. The STROBE checklist is best used in conjunction with this article (freely available on the Web sites of PLoS Medicine at <http://www.plosmedicine.org/>, Annals of Internal Medicine at <http://www.annals.org/>, and Epidemiology at <http://www.epidem.com/>). Information on the STROBE Initiative is available at <http://www.strobe-statement.org>.
