# Supplementary material for: Correlations of chlamydia and gonorrhoea among pharyngeal, rectal and urethral sites among Thai men who have sex with men: multicentre community-led test and treat cohort in Thailand
Source: PubMed Central journal article supplement — BMJ Open. 2019 Jun 27;9(6):e028162. doi: 10.1136/bmjopen-2018-028162 (PMC6609041; doi:10.1136/bmjopen-2018-028162), 2019-06-27
Supplement: bmjopen-2018-028162supp001.pdf [file bmjopen-2018-028162supp001.pdf]

**Supplementary File 1.** Demographic of all men who have sex with men enrolled in the community-based test and treat cohort

| Characteristics                                       | Overall<br>(n=1858) |      | MSM who were<br>included in the<br>analysis (completed 3<br>sites CT/NG<br>screening)<br>(n=1610) |      | MSM who were<br>excluded from the<br>analysis (did not<br>complete 3 sites<br>CT/NG screening)<br>(n=248) |      | p-value |
|-------------------------------------------------------|---------------------|------|---------------------------------------------------------------------------------------------------|------|-----------------------------------------------------------------------------------------------------------|------|---------|
|                                                       | n                   | %    | n                                                                                                 | %    | n                                                                                                         | %    |         |
| <b>Median age (IQR) years</b>                         | 24.2<br>(20.9-30.2) |      | 24.1<br>(20.8-30.0)                                                                               |      | 24.4<br>(21.4-31.9)                                                                                       |      | 0.09    |
| <b>Site</b>                                           |                     |      |                                                                                                   |      |                                                                                                           |      | <0.001  |
| Bangkok                                               | 824                 | 44.4 | 676                                                                                               | 42.0 | 148                                                                                                       | 59.7 |         |
| Chiang Mai                                            | 564                 | 30.4 | 541                                                                                               | 33.6 | 23                                                                                                        | 9.3  |         |
| Hat Yai                                               | 216                 | 11.6 | 152                                                                                               | 9.4  | 64                                                                                                        | 25.8 |         |
| Pattaya city                                          | 254                 | 13.7 | 241                                                                                               | 15.0 | 13                                                                                                        | 5.2  |         |
| <b>Marital status</b>                                 |                     |      |                                                                                                   |      |                                                                                                           |      | <0.001  |
| Single                                                | 1319/1845           | 71.5 | 1158/1598                                                                                         | 72.5 | 161/247                                                                                                   | 65.2 |         |
| Living together with male partner                     | 434/1845            | 23.5 | 381/1598                                                                                          | 23.8 | 53/247                                                                                                    | 21.5 |         |
| Married to a woman                                    | 92/1845             | 5.0  | 59/1598                                                                                           | 3.7  | 33/247                                                                                                    | 13.4 |         |
| <b>Highest education</b>                              |                     |      |                                                                                                   |      |                                                                                                           |      | 0.003   |
| Lower than high school                                | 392/1838            | 21.3 | 325/1594                                                                                          | 20.4 | 67/244                                                                                                    | 27.5 |         |
| High school                                           | 710/1838            | 38.6 | 638/1594                                                                                          | 40.0 | 72/244                                                                                                    | 29.5 |         |
| Higher than high school                               | 736/1838            | 40.1 | 631/1594                                                                                          | 39.6 | 105/244                                                                                                   | 43.0 |         |
| <b>Main occupation</b>                                |                     |      |                                                                                                   |      |                                                                                                           |      | 0.13    |
| Unemployed                                            | 116/1843            | 6.3  | 97/1598                                                                                           | 6.1  | 19/245                                                                                                    | 7.8  |         |
| Student                                               | 547/1843            | 29.7 | 486/1598                                                                                          | 30.4 | 61/245                                                                                                    | 24.9 |         |
| Sex worker                                            | 367/1843            | 19.9 | 707/1598                                                                                          | 44.2 | 106/245                                                                                                   | 43.3 |         |
| Employed, other than sex worker                       | 813/1843            | 44.1 | 308/1598                                                                                          | 19.3 | 59/245                                                                                                    | 24.1 |         |
| <b>Income &gt;10,000 THB (\$320) per month</b>        | 792/1594            | 49.7 | 672/1383                                                                                          | 48.6 | 120/211                                                                                                   | 56.9 | 0.03    |
| <b>Median age (IQR) of first sexual intercourse</b>   | 17<br>(15-19)       |      | 17<br>(15-19)                                                                                     |      | 17<br>(15-19)                                                                                             |      | 0.46    |
| <b>Male circumcision</b>                              | 213/1603            | 13.3 | 186/1391                                                                                          | 13.4 | 27/212                                                                                                    | 12.7 | 0.80    |
| <b>Number of sexual partners in the past 6 months</b> |                     |      |                                                                                                   |      |                                                                                                           |      | 0.27    |
| No sexual partner                                     | 39/1851             | 2.1  | 30/1603                                                                                           | 1.9  | 9                                                                                                         | 3.6  |         |
| Single partner                                        | 353/1851            | 19.1 | 308/1603                                                                                          | 19.2 | 45                                                                                                        | 18.2 |         |
| Multiple partners                                     | 1009/1851           | 54.5 | 870/1603                                                                                          | 54.3 | 139                                                                                                       | 56.1 |         |
| Refuse to answer                                      | 450/1851            | 24.3 | 395/1603                                                                                          | 24.6 | 55                                                                                                        | 22.2 |         |
| <b>Unprotected sex in the past 6 months</b>           | 1432/1831           | 78.2 | 1261/1586                                                                                         | 79.5 | 171/245                                                                                                   | 69.8 | 0.001   |
| <b>Illicit drug used in the past 6 months</b>         | 685/1765            | 38.8 | 599/1530                                                                                          | 39.2 | 86/235                                                                                                    | 36.6 | 0.45    |
| <b>Self-reported STIs in the past 6 months</b>        |                     |      |                                                                                                   |      |                                                                                                           |      | 0.007   |
| No                                                    | 1157/1788           | 64.7 | 977/1546                                                                                          | 63.2 | 180/242                                                                                                   | 74.4 |         |
| Yes                                                   | 119/1788            | 6.7  | 106/1546                                                                                          | 6.9  | 13/242                                                                                                    | 5.4  |         |
| Not sure                                              | 512/1788            | 28.6 | 463/1546                                                                                          | 29.9 | 49/242                                                                                                    | 20.2 |         |
| <b>Group sex in the past 6 months</b>                 | 217/1747            | 12.4 | 207/1520                                                                                          | 13.6 | 10/227                                                                                                    | 4.4  | <0.001  |
| <b>Overall CT infections</b>                          | 379/1842            | 20.6 | 349                                                                                               | 21.7 | 30/232                                                                                                    | 12.9 | 0.002   |
| Pharyngeal CT                                         | 54/1840             | 2.9  | 48                                                                                                | 3.0  | 6/230                                                                                                     | 2.6  | 0.75    |
| Rectal CT                                             | 245/1617            | 15.2 | 242                                                                                               | 15.0 | 3/7                                                                                                       | 42.9 | 0.04    |
| Urethral CT                                           | 133/1833            | 7.3  | 112                                                                                               | 7.0  | 21/223                                                                                                    | 9.4  | 0.18    |
| <b>Overall NG infections</b>                          | 267/1842            | 14.5 | 249                                                                                               | 15.5 | 18/232                                                                                                    | 7.8  | 0.002   |
| Pharyngeal NG                                         | 120/1840            | 6.5  | 110                                                                                               | 6.8  | 10/230                                                                                                    | 4.4  | 0.15    |
| Rectal NG                                             | 151/1617            | 9.3  | 150                                                                                               | 9.3  | 1/7                                                                                                       | 14.3 | 0.65    |
| Urethral NG                                           | 64/1833             | 3.5  | 56                                                                                                | 3.5  | 8/223                                                                                                     | 3.6  | 0.93    |

Abbreviations: CT, *Chlamydia trachomatis*; NG, *Neisseria gonorrhoeae*; STIs, sexually transmitted infections
